# Supplementary material for: Identification of urine protein biomarkers with the potential for early detection of lung cancer
Source: PubMed Central journal article supplement (PMC4488871; doi:10.1038/srep11805), 2015-07-02
Supplement: srep11805-s1.pdf [file srep11805-s1.pdf]

**Identification of urine protein biomarkers with the potential for early detection of lung  
cancer**

Hongjuan Zhang<sup>1\*</sup>, Jing Cao<sup>2\*</sup>, Lin Li<sup>1\*</sup>, Yanbin Liu<sup>1\*</sup>, Hongzhao<sup>1</sup>, Aiqun Zhang<sup>3</sup>, Huanwei  
Huang<sup>1</sup>, She Chen<sup>1</sup>, Mengqiu Dong<sup>1</sup>, Lei Yu<sup>4</sup>, Jian Zhang<sup>2#</sup>, Liang Chen<sup>1,5#</sup>

**Running title: proteomic analysis of urine samples of Kras mutation positive mice and  
patients for efficient identification of biomarkers**

### **LSL-KRAS<sup>G12D</sup> and TetO- KRAS<sup>G12D</sup> mouse model:**

The LSL-KRAS<sup>G12D</sup> knock-in mice kindly gifted by Tyler Jacks and crossed to FVB background, tumor induction was done by nasal inhalation of 10ul Adneo-Cre virus (Sino gene, 2.5\*10<sup>11</sup>pfu/ml) in 125ul DMEM(Hyclone,SH30022.01B) plus 0.6ul 2M CaCl<sub>2</sub>. 3.5-4 months after induction, panting mice of hunched posture were used for urine collection. The transgenic TetO- KRAS<sup>G12D</sup> mouse was established in our laboratory, PCYL50 construct with TRE elements was used to drive KRAS<sup>G12D</sup> expression, supplementary figure 1A shows the detailed map of this construct. Conventional pronuclei microinjection was conducted by transgenic center in our institute, founder #98 was confirmed for stable KRAS<sup>G12D</sup> expression when crossed with CC10rtTA, and fed with doxycyclin diet.

### **Protein lysate preparation and trypsin digestion**

The paired urine samples for quantitative mass spectrometric analysis were precipitated overnight by adding ten volumes of pre-chilled (-20°C) TCA:acetone(8:1), followed by centrifugation at 16,000 g for 20 minutes at 4°C. The protein pellet was washed with acetone once and dried in air briefly, then re-suspended with 2 M urea in 200 mM triethylammoniumbicarbonate(TAEB). Around 100 µg of protein from each sample was reduced by adding 1 µL of 200 mM TCEP and incubated at 55°C for 30 min, followed by alkylation by adding 1 µL of 375 mM iodoacetamide and incubated for 30 minutes in the dark. Around 2.5 µg of sequencing grade modified trypsin (Promega) was added to each protein solution and incubated at 37 °C overnight for trypsin digestion.

### **TMT Isobaric Reagent labeling**

The obtained tryptic peptides were labeled individually with TMT2-126 for control, TMT2-127 for tumor according to the manufacturer's protocol, Label reagent was from TMTwoplex Isobaric Labeling Reagent Set (Thermo, 90061, US). Briefly, each tube of 0.8 mg TMT Label Reagent was dissolved in 41 µL anhydrous acetonitrile and the solution was transferred to each sample of the digested tryptic peptides. The mixture was incubated at RT for 1 hr, and the reaction was quenched by adding 8 µL of 5% hydroxylamine. Equal amount of TMT labeled peptides from the two samples were mixed for the following SCX fractionation.

### **Fractionation of tryptic peptides by SCX chromatography**

For TMT Reagent labeled peptides, around 50 µg of peptides were desalted and loaded onto a

home-made capillary SCX column (75  $\mu\text{m}$  ID, 8 cm long) packed with 5  $\mu\text{m}$ , 100  $\text{\AA}$  pore size Luna spherical strong cation exchange media (Phenomenex). The peptide mixture was fractionated with the gradient as shown in Table 1 generated by an Agilent 1200 quaternary pump system with 1 $\mu\text{L}/\text{min}$  flow rate (Buffer A: 7 mM  $\text{KH}_2\text{PO}_4$ , pH 2.65, 10% acetonitrile ; Buffer B: 7 mM  $\text{KH}_2\text{PO}_4$ , 350 mM  $\text{KCl}$ , pH 2.65, 10% acetonitrile; Buffer C: 50 mM  $\text{K}_2\text{HPO}_4$ , pH 7.5).

**Supplementary Tables 1.** SCX gradient for TMT Reagent labeled peptides.

| Time (min) | Buffer A (%) | Buffer B (%) | Buffer C (%) |
|------------|--------------|--------------|--------------|
| 0          | 100          | 0            | 0            |
| 5          | 95           | 5            | 0            |
| 30         | 50           | 50           | 0            |
| 60         | 0            | 100          | 0            |
| 60.5       | 0            | 0            | 100          |
| 70         | 0            | 0            | 100          |

#### **LC-MS/MS analyzes of fractionated peptides**

Each fraction of peptides from TMT Reagent labeled peptides were separated by a home-made analytical capillary column (50  $\mu\text{m} \times 15 \text{ cm}$ ) packed with 5  $\mu\text{m}$  spherical C18 reversed phase material (YMC). A Waters nanoAcquity UPLC system was used to generate the following HPLC gradient: 0-30% B in 75 min, 30-70% B in 15 min , 70-90% B in 5 min (A = 0.1% formic acid in water, B = 0.1% formic acid in acetonitrile ). The eluted peptides were sprayed into a LTQ Orbitrap Velos mass spectrometer (Thermo) equipped with a nano-ESI ion source. The mass spectrometer was operated in data-dependent mode with one MS scan followed by ten HCD (High-energy Collisional Dissociation) scans for each cycle. Database searches were performed on an in-house Mascot server (Matrix Science Ltd.) against IPI (International Protein Index) mouse protein database. The search parameters were set as follows: 7 ppm mass tolerance for precursor ions; 0.02 Da mass tolerance for product ions; three missed cleavage sites were allowed for trypsin digestion; enzyme was chosen as semi-Trypsin which allows non-specific cleavage at peptide N-terminus; three variable modifications were included: protein N-Terminal acetylation, methionine oxidation, cysteine carbamidomethylation. For TMT Reagent labeled samples, two fixed modification were included: protein N-Terminal TMT labeling, lysine TMT labeling. The

search results were filtered with both peptide significance threshold and expectation value to be 0.05. The search results were further processed by Mascot Percolator to control the false-positive rate to be below 1%. The quantification of the two TMT reagent labeled samples was automatically done by Mascot search engine. The report ion mass tolerance was set to 10 ppm and only the unique peptides were used for quantification. The fold change ratio (CRE/GFP) < 0.67 (down-regulated) or > 1.5 (up-regulated) was defined as the cutoff value to designate significant changes in protein level.

### **Informatics analysis**

To compare the overlapped protein in mice and human urine samples using IPI accession number, we firstly converted the IPI accession numbers of mice and human proteins to Ensemble Gene ID through DAVID (<http://david.abcc.ncifcrf.gov/home.jsp>), and the human Ensemble Gene IDs were then used to search for their mouse homologue genes through ensemble biomaRT (<http://asia.ensembl.org/biomart/martview/>), then we compared the human to mouse homologue genes with mouse Ensemble Gene IDs to get overlapping proteins. Venny (<http://bioinfogp.cnb.csic.es/tools/venny/>) was utilized to compare different groups of urinary proteins and get the intersection charts. DAVID (<http://david.abcc.ncifcrf.gov/home.jsp>) was used to annotate cellular component and biological process for the differentially expressed proteins. Protein-protein interaction of the 7 up-regulated proteins was analyzed by STRING (Search Tool for the Retrieval of Interacting Genes/Proteins, version 9.1, <http://string-db.org/>).

### **Western blotting**

Urine protein was precipitated by TCA:acetone and dissolved in 8M urea, due to the absence of a commonly recognized loading control in urine proteins, protein concentration was carefully quantified by Bradford protein assay kit (Bio-rad, 500-0006), and 20ug total urine proteins for each well were applied for western blotting. Proteins were separated by 8%w/v SDS-PAGE gel and transferred onto PVDF membrane (0.22um) using the wet transfer system (Bio-rad, 170-3940). The membrane was blocked with 5% milk in TBST for 1h at room temperature. Subsequently, membranes were incubated with rabbit anti mouse and human CP with 1:1000 dilution overnight at 4°C. After 4 times washing with TBST (0.1% Tween 20), the membranes were then incubated with 1:5000 dilution of goat anti-rabbit secondary antibody (Sigma, A6154) for 1h at room temperature. Then the membranes were washed 4 times with TBST (0.1% Tween 20) and colored

with ECL kit (Beijing PreGene Biotechnology Company, PE-500). Band intensity was measured by ImageJ.

### **ELISA Analysis**

To quantify Orm1 protein level in human urine using Human alpha 1-Acid Glycoprotein Quantikine ELISA Kit (R&D, DAGP00), we firstly used ORM1 stock (200ng/ml) to produce a dilution series of standard solutions: 200ng/ml, 100ng/ml, 50ng/ml, 25ng/ml, 12.5ng/ml, 6.25ng/ml, 3.13ng/ml. Then we diluted urine samples from lung cancer patients and healthy control subjects by adding 20ul of urine to 180ul of dilution buffer supplied by the kit. Followed by the manufacturer's instructions, we added 100ul of assay diluents buffer to each well that had been pre-coated with a monoclonal antibody specific for human Orm1. Then we added 50ul of standard or sample per well, each experimental group was performed in two biological replicates and incubated for 2 hours at 37°C. After incubation, we discarded the supernatant and washed the plates four times with wash buffer. Then we added 200ul of HRP-conjugated polyclonal antibody against human Orm1 to each well and incubated 2 hours at 37°C. We then repeated the wash step as on above. Then we added 200ul of substrate solution and incubated 30 minutes in dark at room temperature, when the color changed from blue to yellow, we added 50ul of stop solution to each well and determined the optical density at 450nm. The protein concentration was determined with built-in standard curves side-by-side.

### **Supplementary Figure Legends**

S1A. Schematic map of pCYL50-TetO-Kras G12D for generating transgenic mice.

S1B. H&E staining of TetO- KRAS<sup>G12D</sup> lung tissue before (Pre-Dox, upper panel) and 20 days after (On-Dox, lower panel) doxycycline treat (scale bars represent 200  $\mu$ m and 50  $\mu$ m in X40 and X200 magnification, respectively)..

S1C. Validation of rabbit anti mouse CP antibodies on 293T cells expressing mouse CP, wild-type 293T was used as negative control, 1:1000 dilution factor was applied.

S1D. Validation of rabbit anti human CP antibodies on 293T cells expressing human CP, wild-type 293T was used as negative control, 1:1000 dilution factor was applied.

S1E. Western blot analysis of CP in serum of 7 KRAS mutation cancer patients and 7 control subjects.

S1F. CP protein level in serum was analyzed by western blot on 36 cancer patients and 18 healthy controls. Band intensities were quantified by ImageJ,  $p=0.063$ .

Supplementary Figure 1

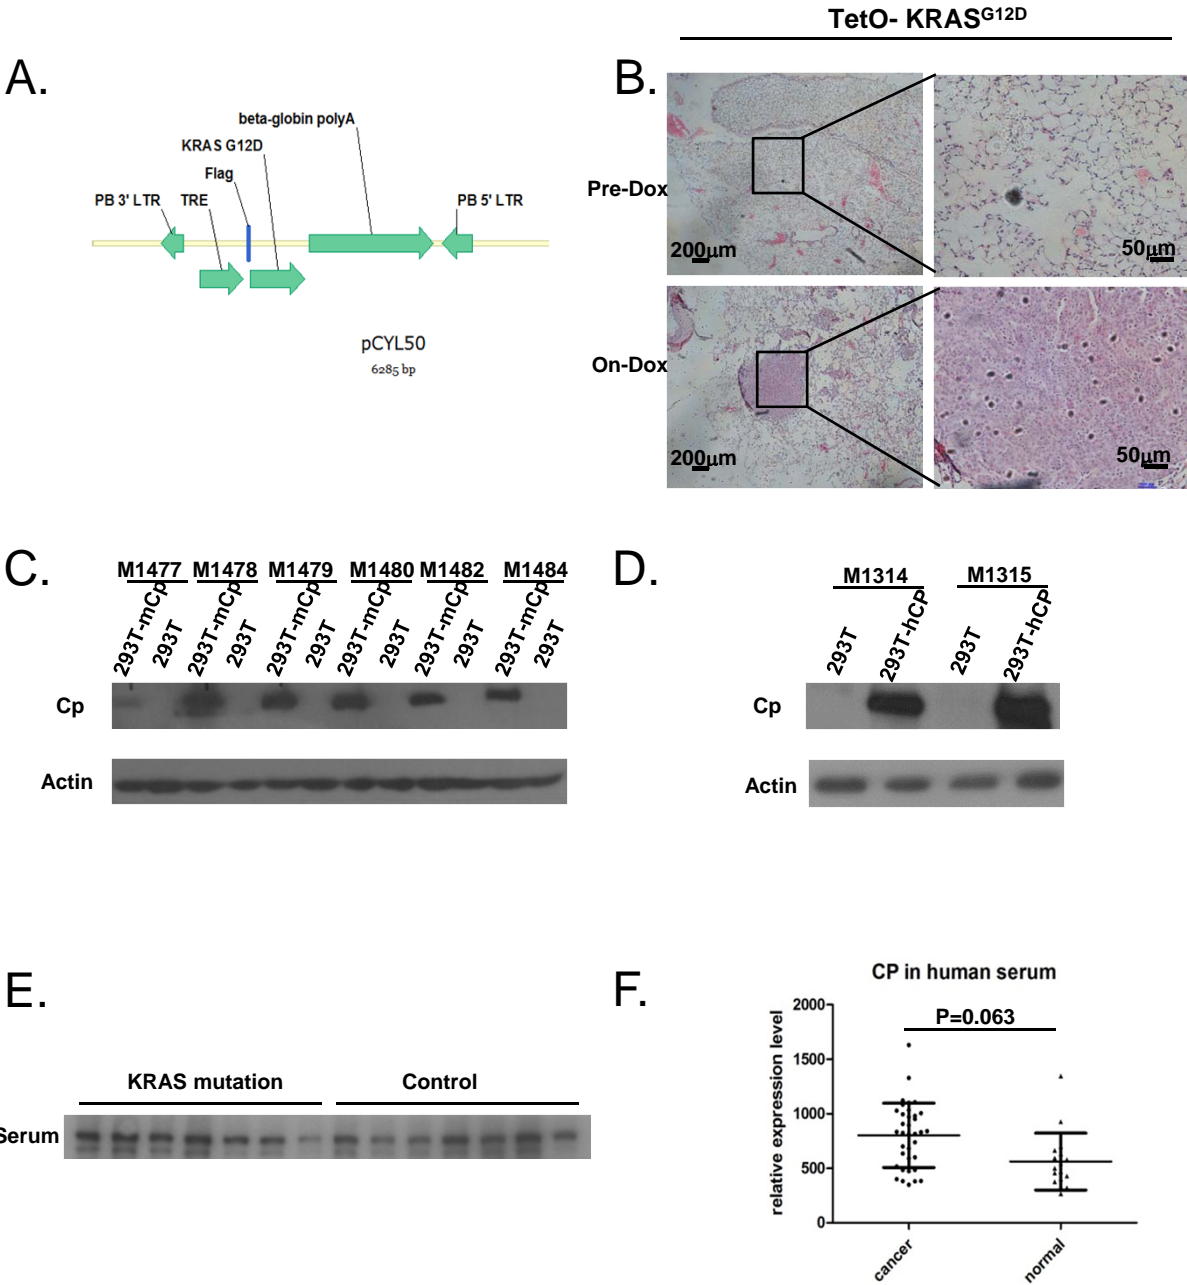

## Supporting Information Tables 1

### Biological processes of 346 proteins in mice urine

| Category  | Term      | Term      | Count | %        | PValue   | List | TotalPop | Hits | Pop   | TotalFold | EnriBonferror | Benjamini  | FDR      |
|-----------|-----------|-----------|-------|----------|----------|------|----------|------|-------|-----------|---------------|------------|----------|
| GOTERM_BF | GO:000961 | response  | 32    | 9.411765 | 1.95E-13 |      | 248      | 347  | 13588 | 5.05271   | 3.09E-10      | 3.09E-10   | 3.26E-10 |
| GOTERM_BF | GO:000650 | proteolys | 41    | 12.05882 | 4.06E-06 |      | 248      | 1034 | 13588 | 2.172537  | 0.006425      | 4.96E-04   | 0.006798 |
| GOTERM_BF | GO:000715 | cell adhe | 34    | 10       | 2.39E-09 |      | 248      | 561  | 13588 | 3.320626  | 3.79E-06      | 9.48E-07   | 4.00E-06 |
| GOTERM_BF | GO:002261 | biologic  | 34    | 10       | 2.50E-09 |      | 248      | 562  | 13588 | 3.314717  | 3.97E-06      | 7.93E-07   | 4.18E-06 |
| GOTERM_BF | GO:000695 | defense r | 31    | 9.117647 | 6.67E-10 |      | 248      | 448  | 13588 | 3.791295  | 1.06E-06      | 3.52E-07   | 1.12E-06 |
| GOTERM_BF | GO:000695 | immune re | 23    | 6.764706 | 4.99E-05 |      | 248      | 471  | 13588 | 2.675536  | 0.076119      | 0.003592   | 0.083467 |
| GOTERM_BF | GO:000695 | inflammat | 21    | 6.176471 | 5.00E-09 |      | 248      | 225  | 13588 | 5.113763  | 7.93E-06      | 1.32E-06   | 8.36E-06 |
| GOTERM_BF | GO:000681 | ion trans | 20    | 5.882353 | 0.060491 |      | 248      | 712  | 13588 | 1.539054  |               | 1 0.497037 | 64.78673 |
| GOTERM_BF | GO:004259 | homeostat | 19    | 5.588235 | 0.020096 |      | 248      | 584  | 13588 | 1.782562  |               | 1 0.268453 | 28.79313 |
| GOTERM_BF | GO:001003 | response  | 18    | 5.294118 | 0.01097  |      | 248      | 505  | 13588 | 1.952922  |               | 1 0.180282 | 16.84857 |
| GOTERM_BF | GO:000609 | generatic | 17    | 5        | 2.31E-05 |      | 248      | 261  | 13588 | 3.568718  | 0.036013      | 0.002036   | 0.038675 |
| GOTERM_BF | GO:001972 | cellular  | 16    | 4.705882 | 0.00154  |      | 248      | 343  | 13588 | 2.555817  | 0.913259      | 0.049659   | 2.545581 |
| GOTERM_BF | GO:000681 | cation tr | 16    | 4.705882 | 0.049369 |      | 248      | 515  | 13588 | 1.702224  |               | 1 0.453243 | 57.12597 |
| GOTERM_BF | GO:004298 | regulatic | 16    | 4.705882 | 0.079959 |      | 248      | 553  | 13588 | 1.585253  |               | 1 0.571411 | 75.19209 |
| GOTERM_BF | GO:004306 | regulatic | 16    | 4.705882 | 0.086878 |      | 248      | 560  | 13588 | 1.565438  |               | 1 0.5938   | 78.13511 |
| GOTERM_BF | GO:001094 | regulatic | 16    | 4.705882 | 0.090407 |      | 248      | 563  | 13588 | 1.557096  |               | 1 0.600034 | 79.50624 |
| GOTERM_BF | GO:000252 | acute inf | 15    | 4.411765 | 1.84E-10 |      | 248      | 81   | 13588 | 10.14636  | 2.92E-07      | 1.46E-07   | 3.08E-07 |
| GOTERM_BF | GO:001605 | carbohydr | 15    | 4.411765 | 1.84E-10 |      | 248      | 81   | 13588 | 10.14636  | 2.92E-07      | 1.46E-07   | 3.08E-07 |
| GOTERM_BF | GO:001633 | cell-cell | 14    | 4.117647 | 3.86E-04 |      | 248      | 236  | 13588 | 3.250273  | 0.458079      | 0.017857   | 0.644058 |
| GOTERM_BF | GO:000761 | behavior  | 14    | 4.117647 | 0.03411  |      | 248      | 405  | 13588 | 1.893986  |               | 1 0.370322 | 44.04006 |
| GOTERM_BF | GO:004206 | wound hea | 13    | 3.823529 | 8.82E-07 |      | 248      | 112  | 13588 | 6.359591  | 0.001398      | 1.55E-04   | 0.001476 |
| GOTERM_BF | GO:000599 | monosacch | 13    | 3.823529 | 1.96E-04 |      | 248      | 191  | 13588 | 3.729184  | 0.266655      | 0.010285   | 0.326567 |
| GOTERM_BF | GO:000268 | positive  | 13    | 3.823529 | 3.90E-04 |      | 248      | 206  | 13588 | 3.457642  | 0.461656      | 0.017537   | 0.650998 |
| GOTERM_BF | GO:004887 | chemical  | 13    | 3.823529 | 0.035046 |      | 248      | 365  | 13588 | 1.951436  |               | 1 0.373497 | 44.93972 |
| GOTERM_BF | GO:003210 | regulatic | 12    | 3.529412 | 2.62E-06 |      | 248      | 103  | 13588 | 6.383339  | 0.004146      | 3.78E-04   | 0.004382 |
| GOTERM_BF | GO:001931 | hexose me | 12    | 3.529412 | 2.65E-04 |      | 248      | 169  | 13588 | 3.890437  | 0.342892      | 0.013454   | 0.441892 |
| GOTERM_BF | GO:000687 | cellular  | 12    | 3.529412 | 0.008316 |      | 248      | 261  | 13588 | 2.519095  | 0.999998      | 0.145876   | 13.03759 |
| GOTERM_BF | GO:005508 | cellular  | 12    | 3.529412 | 0.010012 |      | 248      | 268  | 13588 | 2.453298  |               | 1 0.169375 | 15.492   |
| GOTERM_BF | GO:005080 | ion homec | 12    | 3.529412 | 0.018474 |      | 248      | 293  | 13588 | 2.243972  |               | 1 0.258241 | 26.79589 |
| GOTERM_BF | GO:005081 | coagulati | 11    | 3.235294 | 5.00E-07 |      | 248      | 70   | 13588 | 8.609908  | 7.93E-04      | 1.13E-04   | 8.37E-04 |
| GOTERM_BF | GO:000759 | blood coe | 11    | 3.235294 | 5.00E-07 |      | 248      | 70   | 13588 | 8.609908  | 7.93E-04      | 1.13E-04   | 8.37E-04 |
| GOTERM_BF | GO:000759 | hemostasi | 11    | 3.235294 | 5.73E-07 |      | 248      | 71   | 13588 | 8.488642  | 9.09E-04      | 1.14E-04   | 9.59E-04 |
| GOTERM_BF | GO:005087 | regulatic | 11    | 3.235294 | 4.74E-06 |      | 248      | 89   | 13588 | 6.771838  | 0.007491      | 5.37E-04   | 0.00793  |



|                    |           |    |          |          |     |     |       |          |          |          |          |
|--------------------|-----------|----|----------|----------|-----|-----|-------|----------|----------|----------|----------|
| GOTERM_BFGO:000597 | polysacch | 11 | 3.235294 | 6.41E-06 | 248 | 92  | 13588 | 6.551017 | 0.010114 | 6.77E-04 | 0.010721 |
| GOTERM_BFGO:001604 | lipid cat | 11 | 3.235294 | 1.67E-04 | 248 | 134 | 13588 | 4.497713 | 0.232169 | 0.009068 | 0.278247 |
| GOTERM_BFGO:00300C | cellular  | 11 | 3.235294 | 4.61E-04 | 248 | 152 | 13588 | 3.965089 | 0.518599 | 0.019564 | 0.768072 |
| GOTERM_BFGO:005508 | cation hc | 11 | 3.235294 | 0.001984 | 248 | 184 | 13588 | 3.275508 | 0.957104 | 0.061037 | 3.266645 |
| GOTERM_BFGO:004858 | positive  | 11 | 3.235294 | 0.002148 | 248 | 186 | 13588 | 3.240288 | 0.966952 | 0.064672 | 3.532366 |
| GOTERM_BFGO:001567 | monovaler | 11 | 3.235294 | 0.050494 | 248 | 303 | 13588 | 1.989088 | 1        | 0.453509 | 57.96655 |
| GOTERM_BFGO:00650C | macromole | 11 | 3.235294 | 0.089846 | 248 | 338 | 13588 | 1.783117 | 1        | 0.599883 | 79.29376 |
| GOTERM_BFGO:000697 | response  | 10 | 2.941176 | 2.80E-05 | 248 | 87  | 13588 | 6.297738 | 0.043387 | 0.002332 | 0.046772 |
| GOTERM_BFGO:000225 | immune ef | 10 | 2.941176 | 4.86E-04 | 248 | 126 | 13588 | 4.348438 | 0.537752 | 0.020102 | 0.810554 |
| GOTERM_BFGO:000999 | response  | 10 | 2.941176 | 7.20E-04 | 248 | 133 | 13588 | 4.119573 | 0.681121 | 0.026846 | 1.198215 |
| GOTERM_BFGO:005118 | cofactor  | 10 | 2.941176 | 0.006131 | 248 | 182 | 13588 | 3.010457 | 0.999942 | 0.118975 | 9.775551 |
| GOTERM_BFGO:004306 | negative  | 10 | 2.941176 | 0.030762 | 248 | 239 | 13588 | 2.292482 | 1        | 0.345275 | 40.7049  |
| GOTERM_BFGO:004306 | negative  | 10 | 2.941176 | 0.034534 | 248 | 244 | 13588 | 2.245505 | 1        | 0.371546 | 44.44932 |
| GOTERM_BFGO:006054 | negative  | 10 | 2.941176 | 0.035271 | 248 | 245 | 13588 | 2.23634  | 1        | 0.372994 | 45.154   |
| GOTERM_BFGO:00017C | in utero  | 10 | 2.941176 | 0.055695 | 248 | 267 | 13588 | 2.052072 | 1        | 0.472736 | 61.65647 |
| GOTERM_BFGO:000715 | homophili | 9  | 2.647059 | 0.001322 | 248 | 117 | 13588 | 4.21464  | 0.877226 | 0.044572 | 2.187827 |
| GOTERM_BFGO:00300C | cellular  | 9  | 2.647059 | 0.003105 | 248 | 134 | 13588 | 3.679947 | 0.992792 | 0.084314 | 5.06936  |
| GOTERM_BFGO:005077 | positive  | 9  | 2.647059 | 0.003401 | 248 | 136 | 13588 | 3.62583  | 0.995495 | 0.083451 | 5.538805 |
| GOTERM_BFGO:00060C | glucose n | 9  | 2.647059 | 0.004057 | 248 | 140 | 13588 | 3.522235 | 0.998414 | 0.091737 | 6.573364 |
| GOTERM_BFGO:000673 | coenzyme  | 9  | 2.647059 | 0.004609 | 248 | 143 | 13588 | 3.448342 | 0.999343 | 0.100752 | 7.437178 |
| GOTERM_BFGO:005506 | di-, tri- | 9  | 2.647059 | 0.005219 | 248 | 146 | 13588 | 3.377486 | 0.999751 | 0.107452 | 8.380046 |
| GOTERM_BFGO:000646 | protein c | 9  | 2.647059 | 0.055648 | 248 | 227 | 13588 | 2.172304 | 1        | 0.474826 | 61.62408 |
| GOTERM_BFGO:007027 | protein c | 9  | 2.647059 | 0.055648 | 248 | 227 | 13588 | 2.172304 | 1        | 0.474826 | 61.62408 |
| GOTERM_BFGO:000602 | aminoglyc | 8  | 2.352941 | 4.01E-05 | 248 | 52  | 13588 | 8.42928  | 0.061652 | 0.003177 | 0.067092 |
| GOTERM_BFGO:000695 | humoral i | 8  | 2.352941 | 5.15E-05 | 248 | 54  | 13588 | 8.117085 | 0.07843  | 0.003545 | 0.086106 |
| GOTERM_BFGO:004427 | cellular  | 8  | 2.352941 | 1.02E-04 | 248 | 60  | 13588 | 7.305376 | 0.149875 | 0.006226 | 0.171106 |
| GOTERM_BFGO:004603 | ATP metat | 8  | 2.352941 | 0.001249 | 248 | 90  | 13588 | 4.870251 | 0.862281 | 0.0431   | 2.06926  |
| GOTERM_BFGO:001003 | response  | 8  | 2.352941 | 0.001421 | 248 | 92  | 13588 | 4.764376 | 0.895103 | 0.046841 | 2.350035 |
| GOTERM_BFGO:00516C | protein n | 8  | 2.352941 | 0.001818 | 248 | 96  | 13588 | 4.56586  | 0.944221 | 0.057204 | 2.998343 |
| GOTERM_BFGO:005124 | negative  | 8  | 2.352941 | 0.002297 | 248 | 100 | 13588 | 4.383226 | 0.973946 | 0.067742 | 3.77402  |
| GOTERM_BFGO:00092C | purine ri | 8  | 2.352941 | 0.002431 | 248 | 101 | 13588 | 4.339828 | 0.978935 | 0.070244 | 3.989478 |
| GOTERM_BFGO:000919 | ribonucle | 8  | 2.352941 | 0.002571 | 248 | 102 | 13588 | 4.29728  | 0.983128 | 0.072808 | 4.213984 |
| GOTERM_BFGO:000914 | purine nu | 8  | 2.352941 | 0.003192 | 248 | 106 | 13588 | 4.135119 | 0.993717 | 0.0837   | 5.206699 |
| GOTERM_BFGO:004508 | innate in | 8  | 2.352941 | 0.003363 | 248 | 107 | 13588 | 4.096473 | 0.995219 | 0.083867 | 5.479579 |
| GOTERM_BFGO:003166 | response  | 8  | 2.352941 | 0.005004 | 248 | 115 | 13588 | 3.811501 | 0.999649 | 0.104607 | 8.048212 |
| GOTERM_BFGO:000914 | nucleosic | 8  | 2.352941 | 0.005004 | 248 | 115 | 13588 | 3.811501 | 0.999649 | 0.104607 | 8.048212 |

|                    |           |   |          |          |     |     |       |          |          |          |          |
|--------------------|-----------|---|----------|----------|-----|-----|-------|----------|----------|----------|----------|
| GOTERM_BFGO:000915 | purine ri | 8 | 2.352941 | 0.00602  | 248 | 119 | 13588 | 3.683383 | 0.999931 | 0.118393 | 9.607095 |
| GOTERM_BFGO:000925 | ribonucle | 8 | 2.352941 | 0.007824 | 248 | 125 | 13588 | 3.506581 | 0.999996 | 0.140948 | 12.31262 |
| GOTERM_BFGO:000616 | purine nu | 8 | 2.352941 | 0.026996 | 248 | 160 | 13588 | 2.739516 | 1        | 0.321275 | 36.73149 |
| GOTERM_BFGO:005124 | positive  | 8 | 2.352941 | 0.029467 | 248 | 163 | 13588 | 2.689096 | 1        | 0.338007 | 39.36632 |
| GOTERM_BFGO:004405 | regulatic | 8 | 2.352941 | 0.074225 | 248 | 201 | 13588 | 2.180709 | 1        | 0.552792 | 72.47534 |
| GOTERM_BFGO:005081 | regulatic | 7 | 2.058824 | 1.06E-06 | 248 | 20  | 13588 | 19.17661 | 0.001684 | 1.69E-04 | 0.001778 |
| GOTERM_BFGO:000695 | acute-phē | 7 | 2.058824 | 1.40E-05 | 248 | 30  | 13588 | 12.78441 | 0.021929 | 0.001303 | 0.023383 |
| GOTERM_BFGO:000695 | complemer | 7 | 2.058824 | 4.19E-05 | 248 | 36  | 13588 | 10.65367 | 0.064235 | 0.003156 | 0.069998 |
| GOTERM_BFGO:000254 | activatic | 7 | 2.058824 | 4.19E-05 | 248 | 36  | 13588 | 10.65367 | 0.064235 | 0.003156 | 0.069998 |
| GOTERM_BFGO:000651 | peptide n | 7 | 2.058824 | 5.76E-05 | 248 | 38  | 13588 | 10.09295 | 0.08724  | 0.003796 | 0.096228 |
| GOTERM_BFGO:000609 | glycolysi | 7 | 2.058824 | 1.34E-04 | 248 | 44  | 13588 | 8.716642 | 0.191923 | 0.007582 | 0.2245   |
| GOTERM_BFGO:000600 | glucose c | 7 | 2.058824 | 3.43E-04 | 248 | 52  | 13588 | 7.37562  | 0.419868 | 0.016872 | 0.572633 |
| GOTERM_BFGO:001932 | hexose cē | 7 | 2.058824 | 3.43E-04 | 248 | 52  | 13588 | 7.37562  | 0.419868 | 0.016872 | 0.572633 |
| GOTERM_BFGO:004636 | monosacch | 7 | 2.058824 | 4.22E-04 | 248 | 54  | 13588 | 7.102449 | 0.488397 | 0.018445 | 0.704369 |
| GOTERM_BFGO:004616 | alcohol c | 7 | 2.058824 | 0.001144 | 248 | 65  | 13588 | 5.900496 | 0.837357 | 0.040437 | 1.897299 |
| GOTERM_BFGO:005160 | protein n | 7 | 2.058824 | 0.001144 | 248 | 65  | 13588 | 5.900496 | 0.837357 | 0.040437 | 1.897299 |
| GOTERM_BFGO:000675 | ATP biosy | 7 | 2.058824 | 0.003758 | 248 | 82  | 13588 | 4.677223 | 0.997451 | 0.089091 | 6.104322 |
| GOTERM_BFGO:000225 | activatic | 7 | 2.058824 | 0.004753 | 248 | 86  | 13588 | 4.459677 | 0.999477 | 0.100958 | 7.6602   |
| GOTERM_BFGO:001648 | protein p | 7 | 2.058824 | 0.005929 | 248 | 90  | 13588 | 4.26147  | 0.99992  | 0.118167 | 9.468484 |
| GOTERM_BFGO:000920 | ribonucle | 7 | 2.058824 | 0.006941 | 248 | 93  | 13588 | 4.124003 | 0.999984 | 0.130493 | 10.99756 |
| GOTERM_BFGO:000920 | purine ri | 7 | 2.058824 | 0.006941 | 248 | 93  | 13588 | 4.124003 | 0.999984 | 0.130493 | 10.99756 |
| GOTERM_BFGO:000914 | purine nu | 7 | 2.058824 | 0.007304 | 248 | 94  | 13588 | 4.08013  | 0.999991 | 0.135271 | 11.5409  |
| GOTERM_BFGO:003015 | regulatic | 7 | 2.058824 | 0.007304 | 248 | 94  | 13588 | 4.08013  | 0.999991 | 0.135271 | 11.5409  |
| GOTERM_BFGO:000914 | nucleosic | 7 | 2.058824 | 0.007681 | 248 | 95  | 13588 | 4.037182 | 0.999995 | 0.140137 | 12.10123 |
| GOTERM_BFGO:004343 | response  | 7 | 2.058824 | 0.007681 | 248 | 95  | 13588 | 4.037182 | 0.999995 | 0.140137 | 12.10123 |
| GOTERM_BFGO:000915 | purine ri | 7 | 2.058824 | 0.013362 | 248 | 107 | 13588 | 3.584414 | 1        | 0.208991 | 20.14948 |
| GOTERM_BFGO:000926 | ribonucle | 7 | 2.058824 | 0.015776 | 248 | 111 | 13588 | 3.455246 | 1        | 0.231042 | 23.35634 |
| GOTERM_BFGO:000616 | purine nu | 7 | 2.058824 | 0.039036 | 248 | 137 | 13588 | 2.799506 | 1        | 0.394202 | 48.62718 |
| GOTERM_BFGO:000961 | response  | 7 | 2.058824 | 0.066992 | 248 | 157 | 13588 | 2.442881 | 1        | 0.524354 | 68.6485  |
| GOTERM_BFGO:000972 | response  | 7 | 2.058824 | 0.080766 | 248 | 165 | 13588 | 2.324438 | 1        | 0.572896 | 75.55364 |
| GOTERM_BFGO:000916 | nucleotic | 7 | 2.058824 | 0.09792  | 248 | 174 | 13588 | 2.204208 | 1        | 0.621998 | 82.16104 |
| GOTERM_BFGO:003019 | regulatic | 6 | 1.764706 | 3.34E-06 | 248 | 14  | 13588 | 23.48157 | 0.005279 | 4.41E-04 | 0.005583 |
| GOTERM_BFGO:000703 | vacuole c | 6 | 1.764706 | 3.45E-04 | 248 | 34  | 13588 | 9.66888  | 0.421164 | 0.016431 | 0.574978 |
| GOTERM_BFGO:003020 | glycosami | 6 | 1.764706 | 7.46E-04 | 248 | 40  | 13588 | 8.218548 | 0.693785 | 0.027147 | 1.240434 |
| GOTERM_BFGO:004424 | cellular  | 6 | 1.764706 | 0.003422 | 248 | 56  | 13588 | 5.870392 | 0.995649 | 0.082687 | 5.573337 |
| GOTERM_BFGO:000244 | lymphocyt | 6 | 1.764706 | 0.012366 | 248 | 76  | 13588 | 4.325552 | 1        | 0.198871 | 18.79026 |

|                    |           |   |          |          |     |     |       |          |          |          |          |
|--------------------|-----------|---|----------|----------|-----|-----|-------|----------|----------|----------|----------|
| GOTERM_BFGO:000246 | adaptive  | 6 | 1.764706 | 0.018403 | 248 | 84  | 13588 | 3.913594 | 1        | 0.259626 | 26.70653 |
| GOTERM_BFGO:000225 | adaptive  | 6 | 1.764706 | 0.018403 | 248 | 84  | 13588 | 3.913594 | 1        | 0.259626 | 26.70653 |
| GOTERM_BFGO:000269 | regulatic | 6 | 1.764706 | 0.022042 | 248 | 88  | 13588 | 3.735704 | 1        | 0.288161 | 31.12192 |
| GOTERM_BFGO:000244 | leukocyte | 6 | 1.764706 | 0.02302  | 248 | 89  | 13588 | 3.69373  | 1        | 0.294222 | 32.26474 |
| GOTERM_BFGO:000679 | sulfur me | 6 | 1.764706 | 0.028328 | 248 | 94  | 13588 | 3.497255 | 1        | 0.33191  | 38.16441 |
| GOTERM_BFGO:000150 | ossificat | 6 | 1.764706 | 0.044036 | 248 | 106 | 13588 | 3.101339 | 1        | 0.425172 | 52.91972 |
| GOTERM_BFGO:004362 | cellular  | 6 | 1.764706 | 0.047073 | 248 | 108 | 13588 | 3.043907 | 1        | 0.442204 | 55.36057 |
| GOTERM_BFGO:000301 | circulatc | 6 | 1.764706 | 0.051858 | 248 | 111 | 13588 | 2.961639 | 1        | 0.457735 | 58.96522 |
| GOTERM_BFGO:000801 | blood cir | 6 | 1.764706 | 0.051858 | 248 | 111 | 13588 | 2.961639 | 1        | 0.457735 | 58.96522 |
| GOTERM_BFGO:006034 | bone deve | 6 | 1.764706 | 0.064088 | 248 | 118 | 13588 | 2.785949 | 1        | 0.515416 | 66.97559 |
| GOTERM_BFGO:000854 | epidermis | 6 | 1.764706 | 0.077802 | 248 | 125 | 13588 | 2.629935 | 1        | 0.563413 | 74.20126 |
| GOTERM_BFGO:000681 | sodium ic | 6 | 1.764706 | 0.077802 | 248 | 125 | 13588 | 2.629935 | 1        | 0.563413 | 74.20126 |
| GOTERM_BFGO:001087 | lipid loc | 6 | 1.764706 | 0.084127 | 248 | 128 | 13588 | 2.568296 | 1        | 0.586092 | 77.00659 |
| GOTERM_BFGO:000682 | anion tra | 6 | 1.764706 | 0.08849  | 248 | 130 | 13588 | 2.528784 | 1        | 0.5963   | 78.77183 |
| GOTERM_BFGO:005105 | positive  | 6 | 1.764706 | 0.092969 | 248 | 132 | 13588 | 2.490469 | 1        | 0.608567 | 80.45088 |
| GOTERM_BFGO:000739 | ectoderm  | 6 | 1.764706 | 0.095252 | 248 | 133 | 13588 | 2.471744 | 1        | 0.615712 | 81.25771 |
| GOTERM_BFGO:005081 | negative  | 5 | 1.470588 | 1.25E-05 | 248 | 9   | 13588 | 30.43907 | 0.019628 | 0.001238 | 0.020905 |
| GOTERM_BFGO:003014 | sphingoli | 5 | 1.470588 | 6.70E-05 | 248 | 13  | 13588 | 21.0732  | 0.100764 | 0.004239 | 0.111956 |
| GOTERM_BFGO:004646 | membrane  | 5 | 1.470588 | 6.70E-05 | 248 | 13  | 13588 | 21.0732  | 0.100764 | 0.004239 | 0.111956 |
| GOTERM_BFGO:000027 | polysacch | 5 | 1.470588 | 5.00E-04 | 248 | 21  | 13588 | 13.04531 | 0.547527 | 0.020129 | 0.832909 |
| GOTERM_BFGO:000704 | lysosome  | 5 | 1.470588 | 6.02E-04 | 248 | 22  | 13588 | 12.45235 | 0.615405 | 0.023606 | 1.002763 |
| GOTERM_BFGO:005088 | neuromusc | 5 | 1.470588 | 0.00322  | 248 | 34  | 13588 | 8.0574   | 0.993991 | 0.083034 | 5.251235 |
| GOTERM_BFGO:004580 | positive  | 5 | 1.470588 | 0.00322  | 248 | 34  | 13588 | 8.0574   | 0.993991 | 0.083034 | 5.251235 |
| GOTERM_BFGO:000030 | response  | 5 | 1.470588 | 0.003975 | 248 | 36  | 13588 | 7.609767 | 0.998195 | 0.091277 | 6.445535 |
| GOTERM_BFGO:001598 | ATP synt  | 5 | 1.470588 | 0.004394 | 248 | 37  | 13588 | 7.404098 | 0.999074 | 0.097619 | 7.102038 |
| GOTERM_BFGO:001598 | energy cc | 5 | 1.470588 | 0.004394 | 248 | 37  | 13588 | 7.404098 | 0.999074 | 0.097619 | 7.102038 |
| GOTERM_BFGO:005125 | protein p | 5 | 1.470588 | 0.005828 | 248 | 40  | 13588 | 6.84879  | 0.999906 | 0.117752 | 9.315059 |
| GOTERM_BFGO:001081 | regulatic | 5 | 1.470588 | 0.005828 | 248 | 40  | 13588 | 6.84879  | 0.999906 | 0.117752 | 9.315059 |
| GOTERM_BFGO:003422 | ion trans | 5 | 1.470588 | 0.00694  | 248 | 42  | 13588 | 6.522657 | 0.999984 | 0.132032 | 10.99596 |
| GOTERM_BFGO:001599 | proton tr | 5 | 1.470588 | 0.014585 | 248 | 52  | 13588 | 5.2683   | 1        | 0.221633 | 21.78915 |
| GOTERM_BFGO:003010 | regulatic | 5 | 1.470588 | 0.014585 | 248 | 52  | 13588 | 5.2683   | 1        | 0.221633 | 21.78915 |
| GOTERM_BFGO:000681 | hydrogen  | 5 | 1.470588 | 0.015556 | 248 | 53  | 13588 | 5.168898 | 1        | 0.230293 | 23.06868 |
| GOTERM_BFGO:000281 | regulatic | 5 | 1.470588 | 0.01871  | 248 | 56  | 13588 | 4.891993 | 1        | 0.258854 | 27.08977 |
| GOTERM_BFGO:000611 | oxidative | 5 | 1.470588 | 0.01871  | 248 | 56  | 13588 | 4.891993 | 1        | 0.258854 | 27.08977 |
| GOTERM_BFGO:000282 | regulatic | 5 | 1.470588 | 0.01871  | 248 | 56  | 13588 | 4.891993 | 1        | 0.258854 | 27.08977 |
| GOTERM_BFGO:000701 | actin fil | 5 | 1.470588 | 0.01871  | 248 | 56  | 13588 | 4.891993 | 1        | 0.258854 | 27.08977 |

|                    |           |   |          |          |     |    |       |          |          |          |          |
|--------------------|-----------|---|----------|----------|-----|----|-------|----------|----------|----------|----------|
| GOTERM_BFGO:005072 | regulatic | 5 | 1.470588 | 0.019843 | 248 | 57 | 13588 | 4.806169 | 1        | 0.270018 | 28.48532 |
| GOTERM_BFGO:00509C | neuromusc | 5 | 1.470588 | 0.023493 | 248 | 60 | 13588 | 4.56586  | 1        | 0.294688 | 32.81133 |
| GOTERM_BFGO:000666 | sphingoli | 5 | 1.470588 | 0.026138 | 248 | 62 | 13588 | 4.418574 | 1        | 0.315063 | 35.79116 |
| GOTERM_BFGO:000166 | response  | 5 | 1.470588 | 0.028954 | 248 | 64 | 13588 | 4.280494 | 1        | 0.335529 | 38.82769 |
| GOTERM_BFGO:000664 | membrane  | 5 | 1.470588 | 0.028954 | 248 | 64 | 13588 | 4.280494 | 1        | 0.335529 | 38.82769 |
| GOTERM_BFGO:000821 | regulatic | 5 | 1.470588 | 0.030427 | 248 | 65 | 13588 | 4.21464  | 1        | 0.344577 | 40.36168 |
| GOTERM_BFGO:00027C | regulatic | 5 | 1.470588 | 0.030427 | 248 | 65 | 13588 | 4.21464  | 1        | 0.344577 | 40.36168 |
| GOTERM_BFGO:007048 | response  | 5 | 1.470588 | 0.030427 | 248 | 65 | 13588 | 4.21464  | 1        | 0.344577 | 40.36168 |
| GOTERM_BFGO:00027C | regulatic | 5 | 1.470588 | 0.038448 | 248 | 70 | 13588 | 3.913594 | 1        | 0.391926 | 48.09901 |
| GOTERM_BFGO:000758 | response  | 5 | 1.470588 | 0.049524 | 248 | 76 | 13588 | 3.604626 | 1        | 0.451828 | 57.24224 |
| GOTERM_BFGO:006024 | anatomic  | 5 | 1.470588 | 0.064431 | 248 | 83 | 13588 | 3.300622 | 1        | 0.514938 | 67.17726 |
| GOTERM_BFGO:006062 | regulatic | 5 | 1.470588 | 0.064431 | 248 | 83 | 13588 | 3.300622 | 1        | 0.514938 | 67.17726 |
| GOTERM_BFGO:001988 | antigen r | 5 | 1.470588 | 0.073889 | 248 | 87 | 13588 | 3.148869 | 1        | 0.55347  | 72.30774 |
| GOTERM_BFGO:000691 | anti-apo  | 5 | 1.470588 | 0.076358 | 248 | 88 | 13588 | 3.113087 | 1        | 0.558702 | 73.51708 |
| GOTERM_BFGO:003019 | negative  | 4 | 1.176471 | 1.14E-04 | 248 | 6  | 13588 | 36.52688 | 0.165374 | 0.006673 | 0.190477 |
| GOTERM_BFGO:000695 | complemer | 4 | 1.176471 | 6.48E-04 | 248 | 10 | 13588 | 21.91613 | 0.642224 | 0.024758 | 1.078207 |
| GOTERM_BFGO:00019C | cell kill | 4 | 1.176471 | 0.002789 | 248 | 16 | 13588 | 13.69758 | 0.988079 | 0.077378 | 4.564294 |
| GOTERM_BFGO:000608 | cellular  | 4 | 1.176471 | 0.003342 | 248 | 17 | 13588 | 12.89184 | 0.995051 | 0.084674 | 5.444975 |
| GOTERM_BFGO:000602 | aminoglyc | 4 | 1.176471 | 0.003956 | 248 | 18 | 13588 | 12.17563 | 0.99814  | 0.092198 | 6.416148 |
| GOTERM_BFGO:005076 | positive  | 4 | 1.176471 | 0.008032 | 248 | 23 | 13588 | 9.528752 | 0.999997 | 0.142813 | 12.61944 |
| GOTERM_BFGO:003109 | regenerat | 4 | 1.176471 | 0.008032 | 248 | 23 | 13588 | 9.528752 | 0.999997 | 0.142813 | 12.61944 |
| GOTERM_BFGO:000674 | glutathic | 4 | 1.176471 | 0.009058 | 248 | 24 | 13588 | 9.13172  | 0.999999 | 0.156151 | 14.11894 |
| GOTERM_BFGO:004254 | response  | 4 | 1.176471 | 0.009058 | 248 | 24 | 13588 | 9.13172  | 0.999999 | 0.156151 | 14.11894 |
| GOTERM_BFGO:005076 | regulatic | 4 | 1.176471 | 0.010157 | 248 | 25 | 13588 | 8.766452 | 1        | 0.169817 | 15.69847 |
| GOTERM_BFGO:001081 | positive  | 4 | 1.176471 | 0.012578 | 248 | 27 | 13588 | 8.117085 | 1        | 0.199936 | 19.08225 |
| GOTERM_BFGO:00091C | coenzyme  | 4 | 1.176471 | 0.015302 | 248 | 29 | 13588 | 7.557286 | 1        | 0.229082 | 22.73569 |
| GOTERM_BFGO:000687 | cellular  | 4 | 1.176471 | 0.015302 | 248 | 29 | 13588 | 7.557286 | 1        | 0.229082 | 22.73569 |
| GOTERM_BFGO:005118 | cofactor  | 4 | 1.176471 | 0.019962 | 248 | 32 | 13588 | 6.84879  | 1        | 0.269142 | 28.63037 |
| GOTERM_BFGO:003409 | response  | 4 | 1.176471 | 0.019962 | 248 | 32 | 13588 | 6.84879  | 1        | 0.269142 | 28.63037 |
| GOTERM_BFGO:000282 | positive  | 4 | 1.176471 | 0.023456 | 248 | 34 | 13588 | 6.44592  | 1        | 0.296593 | 32.76896 |
| GOTERM_BFGO:000282 | positive  | 4 | 1.176471 | 0.023456 | 248 | 34 | 13588 | 6.44592  | 1        | 0.296593 | 32.76896 |
| GOTERM_BFGO:005507 | iron ion  | 4 | 1.176471 | 0.025319 | 248 | 35 | 13588 | 6.261751 | 1        | 0.311438 | 34.88256 |
| GOTERM_BFGO:00027C | positive  | 4 | 1.176471 | 0.035789 | 248 | 40 | 13588 | 5.479032 | 1        | 0.374961 | 45.64537 |
| GOTERM_BFGO:00027C | positive  | 4 | 1.176471 | 0.035789 | 248 | 40 | 13588 | 5.479032 | 1        | 0.374961 | 45.64537 |
| GOTERM_BFGO:004578 | positive  | 4 | 1.176471 | 0.042983 | 248 | 43 | 13588 | 5.096774 | 1        | 0.41979  | 52.04443 |
| GOTERM_BFGO:003166 | cellular  | 4 | 1.176471 | 0.048148 | 248 | 45 | 13588 | 4.870251 | 1        | 0.447278 | 56.19542 |

|                    |           |   |          |          |     |    |       |          |          |          |          |
|--------------------|-----------|---|----------|----------|-----|----|-------|----------|----------|----------|----------|
| GOTERM_BFGO:000269 | positive  | 4 | 1.176471 | 0.05084  | 248 | 46 | 13588 | 4.764376 | 1        | 0.453406 | 58.22225 |
| GOTERM_BFGO:000680 | oxygen ar | 4 | 1.176471 | 0.053604 | 248 | 47 | 13588 | 4.663006 | 1        | 0.464277 | 60.21107 |
| GOTERM_BFGO:000682 | chloride  | 4 | 1.176471 | 0.099285 | 248 | 61 | 13588 | 3.592808 | 1        | 0.625184 | 82.60751 |
| GOTERM_BFGO:004647 | glycosphi | 3 | 0.882353 | 0.003174 | 248 | 5  | 13588 | 32.87419 | 0.99354  | 0.084658 | 5.178928 |
| GOTERM_BFGO:004273 | fibrinoly | 3 | 0.882353 | 0.003174 | 248 | 5  | 13588 | 32.87419 | 0.99354  | 0.084658 | 5.178928 |
| GOTERM_BFGO:001937 | glycolipi | 3 | 0.882353 | 0.004704 | 248 | 6  | 13588 | 27.39516 | 0.999435 | 0.101325 | 7.584322 |
| GOTERM_BFGO:003110 | organ reg | 3 | 0.882353 | 0.004704 | 248 | 6  | 13588 | 27.39516 | 0.999435 | 0.101325 | 7.584322 |
| GOTERM_BFGO:000687 | cellular  | 3 | 0.882353 | 0.013451 | 248 | 10 | 13588 | 16.4371  | 1        | 0.208211 | 20.2705  |
| GOTERM_BFGO:004671 | muscle mæ | 3 | 0.882353 | 0.016245 | 248 | 11 | 13588 | 14.94282 | 1        | 0.234936 | 23.96442 |
| GOTERM_BFGO:005507 | copper ic | 3 | 0.882353 | 0.016245 | 248 | 11 | 13588 | 14.94282 | 1        | 0.234936 | 23.96442 |
| GOTERM_BFGO:001991 | lipid stc | 3 | 0.882353 | 0.022496 | 248 | 13 | 13588 | 12.64392 | 1        | 0.290837 | 31.6541  |
| GOTERM_BFGO:000289 | positive  | 3 | 0.882353 | 0.025934 | 248 | 14 | 13588 | 11.74078 | 1        | 0.31536  | 35.56672 |
| GOTERM_BFGO:000271 | positive  | 3 | 0.882353 | 0.025934 | 248 | 14 | 13588 | 11.74078 | 1        | 0.31536  | 35.56672 |
| GOTERM_BFGO:003016 | platelet  | 3 | 0.882353 | 0.033397 | 248 | 16 | 13588 | 10.27319 | 1        | 0.366532 | 43.34481 |
| GOTERM_BFGO:000267 | regulatic | 3 | 0.882353 | 0.041585 | 248 | 18 | 13588 | 9.13172  | 1        | 0.41165  | 50.85982 |
| GOTERM_BFGO:003461 | cellular  | 3 | 0.882353 | 0.041585 | 248 | 18 | 13588 | 9.13172  | 1        | 0.41165  | 50.85982 |
| GOTERM_BFGO:005079 | regulatic | 3 | 0.882353 | 0.041585 | 248 | 18 | 13588 | 9.13172  | 1        | 0.41165  | 50.85982 |
| GOTERM_BFGO:000668 | glycosphi | 3 | 0.882353 | 0.045932 | 248 | 19 | 13588 | 8.651104 | 1        | 0.436537 | 54.45799 |
| GOTERM_BFGO:000680 | superoxic | 3 | 0.882353 | 0.045932 | 248 | 19 | 13588 | 8.651104 | 1        | 0.436537 | 54.45799 |
| GOTERM_BFGO:000609 | gluconeog | 3 | 0.882353 | 0.050438 | 248 | 20 | 13588 | 8.218548 | 1        | 0.455572 | 57.92509 |
| GOTERM_BFGO:004274 | hydrogen  | 3 | 0.882353 | 0.050438 | 248 | 20 | 13588 | 8.218548 | 1        | 0.455572 | 57.92509 |
| GOTERM_BFGO:000931 | oligosacc | 3 | 0.882353 | 0.050438 | 248 | 20 | 13588 | 8.218548 | 1        | 0.455572 | 57.92509 |
| GOTERM_BFGO:000666 | glycolipi | 3 | 0.882353 | 0.059897 | 248 | 22 | 13588 | 7.471408 | 1        | 0.495929 | 64.41268 |
| GOTERM_BFGO:001652 | negative  | 3 | 0.882353 | 0.059897 | 248 | 22 | 13588 | 7.471408 | 1        | 0.495929 | 64.41268 |
| GOTERM_BFGO:004689 | regulatic | 3 | 0.882353 | 0.059897 | 248 | 22 | 13588 | 7.471408 | 1        | 0.495929 | 64.41268 |
| GOTERM_BFGO:003459 | cellular  | 3 | 0.882353 | 0.059897 | 248 | 22 | 13588 | 7.471408 | 1        | 0.495929 | 64.41268 |
| GOTERM_BFGO:000609 | tricarbox | 3 | 0.882353 | 0.064836 | 248 | 23 | 13588 | 7.146564 | 1        | 0.51482  | 67.41447 |
| GOTERM_BFGO:003030 | cholester | 3 | 0.882353 | 0.064836 | 248 | 23 | 13588 | 7.146564 | 1        | 0.51482  | 67.41447 |
| GOTERM_BFGO:001591 | sterol tr | 3 | 0.882353 | 0.064836 | 248 | 23 | 13588 | 7.146564 | 1        | 0.51482  | 67.41447 |
| GOTERM_BFGO:004635 | acetyl-Cc | 3 | 0.882353 | 0.069907 | 248 | 24 | 13588 | 6.84879  | 1        | 0.537636 | 70.2473  |
| GOTERM_BFGO:001931 | hexose bi | 3 | 0.882353 | 0.075103 | 248 | 25 | 13588 | 6.574839 | 1        | 0.554832 | 72.90862 |
| GOTERM_BFGO:000609 | pyruvate  | 3 | 0.882353 | 0.075103 | 248 | 25 | 13588 | 6.574839 | 1        | 0.554832 | 72.90862 |
| GOTERM_BFGO:000906 | aerobic r | 3 | 0.882353 | 0.085844 | 248 | 27 | 13588 | 6.087814 | 1        | 0.59151  | 77.71729 |
| GOTERM_BFGO:004259 | response  | 3 | 0.882353 | 0.097014 | 248 | 29 | 13588 | 5.667964 | 1        | 0.620595 | 81.85902 |
| GOTERM_BFGO:000931 | oligosacc | 2 | 0.588235 | 0.036026 | 248 | 2  | 13588 | 54.79032 | 1        | 0.374557 | 45.86843 |
| GOTERM_BFGO:004618 | aldehyde  | 2 | 0.588235 | 0.036026 | 248 | 2  | 13588 | 54.79032 | 1        | 0.374557 | 45.86843 |

|                              |   |          |          |     |   |       |          |   |          |          |
|------------------------------|---|----------|----------|-----|---|-------|----------|---|----------|----------|
| GOTERM_BF GO:004274regulatic | 2 | 0.588235 | 0.053552 | 248 | 3 | 13588 | 36.52688 | 1 | 0.466343 | 60.17451 |
| GOTERM_BF GO:000668gangliosi | 2 | 0.588235 | 0.053552 | 248 | 3 | 13588 | 36.52688 | 1 | 0.466343 | 60.17451 |
| GOTERM_BF GO:002241circadiar | 2 | 0.588235 | 0.053552 | 248 | 3 | 13588 | 36.52688 | 1 | 0.466343 | 60.17451 |
| GOTERM_BF GO:004518regulatic | 2 | 0.588235 | 0.053552 | 248 | 3 | 13588 | 36.52688 | 1 | 0.466343 | 60.17451 |
| GOTERM_BF GO:004274circadiar | 2 | 0.588235 | 0.07076  | 248 | 4 | 13588 | 27.39516 | 1 | 0.539738 | 70.7004  |
| GOTERM_BF GO:004593negative  | 2 | 0.588235 | 0.07076  | 248 | 4 | 13588 | 27.39516 | 1 | 0.539738 | 70.7004  |
| GOTERM_BF GO:001089negative  | 2 | 0.588235 | 0.07076  | 248 | 4 | 13588 | 27.39516 | 1 | 0.539738 | 70.7004  |
| GOTERM_BF GO:000704lysosomal | 2 | 0.588235 | 0.087657 | 248 | 5 | 13588 | 21.91613 | 1 | 0.594937 | 78.44478 |
| GOTERM_BF GO:000668sphingomy | 2 | 0.588235 | 0.087657 | 248 | 5 | 13588 | 21.91613 | 1 | 0.594937 | 78.44478 |

## Supporting Information Tables 2

### Biological processes of 50 up-regulated proteins in mice urine

| Category  | Term               | Count | %        | PValue   | List | TotalPop | Hits  | Pop      | TotalFold | Enri     | Bonferroni | Benjamini | FDR |
|-----------|--------------------|-------|----------|----------|------|----------|-------|----------|-----------|----------|------------|-----------|-----|
| GOTERM_BF | GO:000961response  | 12    | 24.4898  | 5.42E-09 | 43   | 347      | 13588 | 10.92795 | 2.94E-06  | 2.94E-06 | 7.90E-06   |           |     |
| GOTERM_BF | GO:000695defense r | 8     | 16.32653 | 4.01E-04 | 43   | 448      | 13588 | 5.642857 | 0.195717  | 0.016615 | 0.582611   |           |     |
| GOTERM_BF | GO:000650proteolys | 8     | 16.32653 | 0.037522 | 43   | 1034     | 13588 | 2.444874 |           | 1        | 0.324175   | 42.71406  |     |
| GOTERM_BF | GO:000252acute inf | 7     | 14.28571 | 1.64E-07 | 43   | 81       | 13588 | 27.30864 | 8.93E-05  | 4.46E-05 | 2.39E-04   |           |     |
| GOTERM_BF | GO:003210regulatic | 7     | 14.28571 | 6.89E-07 | 43   | 103      | 13588 | 21.47573 | 3.74E-04  | 1.25E-04 | 0.001003   |           |     |
| GOTERM_BF | GO:000695inflammat | 7     | 14.28571 | 6.15E-05 | 43   | 225      | 13588 | 9.831111 | 0.032822  | 0.005547 | 0.089491   |           |     |
| GOTERM_BF | GO:000681cation tr | 7     | 14.28571 | 0.004734 | 43   | 515      | 13588 | 4.295146 | 0.923969  | 0.094348 | 6.678932   |           |     |
| GOTERM_BF | GO:000715cell adhe | 7     | 14.28571 | 0.007138 | 43   | 561      | 13588 | 3.942959 | 0.979548  | 0.114455 | 9.909027   |           |     |
| GOTERM_BF | GO:002261biologic  | 7     | 14.28571 | 0.007198 | 43   | 562      | 13588 | 3.935943 | 0.980214  | 0.112079 | 9.989047   |           |     |
| GOTERM_BF | GO:000681ion trans | 7     | 14.28571 | 0.021251 | 43   | 712      | 13588 | 3.106742 | 0.999991  | 0.232859 | 26.8684    |           |     |
| GOTERM_BF | GO:005124positive  | 6     | 12.2449  | 1.39E-04 | 43   | 163      | 13588 | 11.6319  | 0.072614  | 0.00751  | 0.202037   |           |     |
| GOTERM_BF | GO:005081coagulati | 5     | 10.20408 | 6.24E-05 | 43   | 70       | 13588 | 22.57143 | 0.033295  | 0.004826 | 0.090802   |           |     |
| GOTERM_BF | GO:000759blood co  | 5     | 10.20408 | 6.24E-05 | 43   | 70       | 13588 | 22.57143 | 0.033295  | 0.004826 | 0.090802   |           |     |
| GOTERM_BF | GO:000759hemostasi | 5     | 10.20408 | 6.59E-05 | 43   | 71       | 13588 | 22.25352 | 0.03517   | 0.004465 | 0.096006   |           |     |
| GOTERM_BF | GO:005087regulatic | 5     | 10.20408 | 1.59E-04 | 43   | 89       | 13588 | 17.75281 | 0.082798  | 0.007826 | 0.231597   |           |     |
| GOTERM_BF | GO:004206wound he  | 5     | 10.20408 | 3.85E-04 | 43   | 112      | 13588 | 14.10714 | 0.188497  | 0.017255 | 0.558772   |           |     |
| GOTERM_BF | GO:004858positive  | 5     | 10.20408 | 0.002535 | 43   | 186      | 13588 | 8.494624 | 0.74797   | 0.082532 | 3.629884   |           |     |
| GOTERM_BF | GO:001567monovaler | 5     | 10.20408 | 0.013945 | 43   | 303      | 13588 | 5.214521 | 0.999512  | 0.177597 | 18.50043   |           |     |
| GOTERM_BF | GO:003000metal ior | 5     | 10.20408 | 0.046782 | 43   | 442      | 13588 | 3.574661 |           | 1        | 0.371598   | 50.23974  |     |
| GOTERM_BF | GO:000695immune re | 5     | 10.20408 | 0.056656 | 43   | 471      | 13588 | 3.354565 |           | 1        | 0.415373   | 57.24282  |     |
| GOTERM_BF | GO:004298regulatic | 5     | 10.20408 | 0.090192 | 43   | 553      | 13588 | 2.857143 |           | 1        | 0.524716   | 74.76482  |     |
| GOTERM_BF | GO:004306regulatic | 5     | 10.20408 | 0.093425 | 43   | 560      | 13588 | 2.821429 |           | 1        | 0.532724   | 76.04035  |     |
| GOTERM_BF | GO:001094regulatic | 5     | 10.20408 | 0.094828 | 43   | 563      | 13588 | 2.806394 |           | 1        | 0.533252   | 76.57488  |     |
| GOTERM_BF | GO:003019regulatic | 4     | 8.163265 | 9.76E-06 | 43   | 14       | 13588 | 90.28571 | 0.005287  | 0.001324 | 0.014219   |           |     |
| GOTERM_BF | GO:005081regulatic | 4     | 8.163265 | 3.02E-05 | 43   | 20       | 13588 | 63.2     | 0.016255  | 0.003272 | 0.043956   |           |     |
| GOTERM_BF | GO:000695acute-ph  | 4     | 8.163265 | 1.05E-04 | 43   | 30       | 13588 | 42.13333 | 0.055524  | 0.006327 | 0.153135   |           |     |
| GOTERM_BF | GO:000675ATP biosy | 4     | 8.163265 | 0.002052 | 43   | 82       | 13588 | 15.41463 | 0.672281  | 0.076593 | 2.94854    |           |     |
| GOTERM_BF | GO:004603ATP metal | 4     | 8.163265 | 0.002676 | 43   | 90       | 13588 | 14.04444 | 0.766657  | 0.082041 | 3.82885    |           |     |
| GOTERM_BF | GO:000920purine ri | 4     | 8.163265 | 0.002937 | 43   | 93       | 13588 | 13.5914  | 0.797571  | 0.084919 | 4.194824   |           |     |
| GOTERM_BF | GO:000920ribonucle | 4     | 8.163265 | 0.002937 | 43   | 93       | 13588 | 13.5914  | 0.797571  | 0.084919 | 4.194824   |           |     |
| GOTERM_BF | GO:000914purine nu | 4     | 8.163265 | 0.003028 | 43   | 94       | 13588 | 13.44681 | 0.807291  | 0.083013 | 4.321224   |           |     |
| GOTERM_BF | GO:000914nucleosic | 4     | 8.163265 | 0.00312  | 43   | 95       | 13588 | 13.30526 | 0.816716  | 0.081337 | 4.449838   |           |     |
| GOTERM_BF | GO:005124negative  | 4     | 8.163265 | 0.003606 | 43   | 100      | 13588 | 12.64    | 0.859361  | 0.089178 | 5.126322   |           |     |

|                             |   |          |          |    |     |       |          |          |          |          |
|-----------------------------|---|----------|----------|----|-----|-------|----------|----------|----------|----------|
| GOTERM_BFGO:00092Cpurine ri | 4 | 8.163265 | 0.003708 | 43 | 101 | 13588 | 12.51485 | 0.866998 | 0.087621 | 5.268333 |
| GOTERM_BFGO:000919ribonucle | 4 | 8.163265 | 0.003813 | 43 | 102 | 13588 | 12.39216 | 0.874343 | 0.086236 | 5.41259  |
| GOTERM_BFGO:000914purine nu | 4 | 8.163265 | 0.004247 | 43 | 106 | 13588 | 11.92453 | 0.90086  | 0.091809 | 6.012142 |
| GOTERM_BFGO:000915purine ri | 4 | 8.163265 | 0.004361 | 43 | 107 | 13588 | 11.81308 | 0.906795 | 0.090553 | 6.16767  |
| GOTERM_BFGO:000926ribonucle | 4 | 8.163265 | 0.004832 | 43 | 111 | 13588 | 11.38739 | 0.927918 | 0.092812 | 6.812367 |
| GOTERM_BFGO:000914nucleosid | 4 | 8.163265 | 0.005332 | 43 | 115 | 13588 | 10.9913  | 0.945157 | 0.098494 | 7.493187 |
| GOTERM_BFGO:000915purine ri | 4 | 8.163265 | 0.005863 | 43 | 119 | 13588 | 10.62185 | 0.958961 | 0.100972 | 8.21002  |
| GOTERM_BFGO:000925ribonucle | 4 | 8.163265 | 0.006718 | 43 | 125 | 13588 | 10.112   | 0.974268 | 0.111362 | 9.352318 |
| GOTERM_BFGO:005077positive  | 4 | 8.163265 | 0.008468 | 43 | 136 | 13588 | 9.294118 | 0.990125 | 0.126997 | 11.6517  |
| GOTERM_BFGO:000616purine nu | 4 | 8.163265 | 0.008639 | 43 | 137 | 13588 | 9.226277 | 0.991009 | 0.125947 | 11.87362 |
| GOTERM_BFGO:000616purine nu | 4 | 8.163265 | 0.013147 | 43 | 160 | 13588 | 7.9      | 0.999243 | 0.17652  | 17.53393 |
| GOTERM_BFGO:000916nucleotic | 4 | 8.163265 | 0.016439 | 43 | 174 | 13588 | 7.264368 | 0.999877 | 0.20149  | 21.45168 |
| GOTERM_BFGO:00344Cnucleobas | 4 | 8.163265 | 0.017717 | 43 | 179 | 13588 | 7.061453 | 0.999939 | 0.206343 | 22.92555 |
| GOTERM_BFGO:003465nucleobas | 4 | 8.163265 | 0.017717 | 43 | 179 | 13588 | 7.061453 | 0.999939 | 0.206343 | 22.92555 |
| GOTERM_BFGO:000268positive  | 4 | 8.163265 | 0.02556  | 43 | 206 | 13588 | 6.135922 | 0.999999 | 0.268339 | 31.42129 |
| GOTERM_BFGO:004427nitrogen  | 4 | 8.163265 | 0.066125 | 43 | 302 | 13588 | 4.18543  | 1        | 0.440348 | 63.08661 |
| GOTERM_BFGO:003109regenerat | 3 | 6.122449 | 0.002265 | 43 | 23  | 13588 | 41.21739 | 0.70802  | 0.078794 | 3.24872  |
| GOTERM_BFGO:000695complemer | 3 | 6.122449 | 0.005498 | 43 | 36  | 13588 | 26.33333 | 0.949886 | 0.098074 | 7.716707 |
| GOTERM_BFGO:000254activatic | 3 | 6.122449 | 0.005498 | 43 | 36  | 13588 | 26.33333 | 0.949886 | 0.098074 | 7.716707 |
| GOTERM_BFGO:000695humoral i | 3 | 6.122449 | 0.012057 | 43 | 54  | 13588 | 17.55556 | 0.998622 | 0.167204 | 16.19753 |
| GOTERM_BFGO:005072regulatic | 3 | 6.122449 | 0.013369 | 43 | 57  | 13588 | 16.63158 | 0.99933  | 0.174962 | 17.80424 |
| GOTERM_BFGO:00516Cprotein n | 3 | 6.122449 | 0.017155 | 43 | 65  | 13588 | 14.58462 | 0.999917 | 0.204804 | 22.28084 |
| GOTERM_BFGO:000225activatic | 3 | 6.122449 | 0.028943 | 43 | 86  | 13588 | 11.02326 | 1        | 0.287746 | 34.80902 |
| GOTERM_BFGO:000269regulatic | 3 | 6.122449 | 0.030196 | 43 | 88  | 13588 | 10.77273 | 1        | 0.293095 | 36.0238  |
| GOTERM_BFGO:001648protein p | 3 | 6.122449 | 0.031471 | 43 | 90  | 13588 | 10.53333 | 1        | 0.293382 | 37.23765 |
| GOTERM_BFGO:00516Cprotein n | 3 | 6.122449 | 0.035419 | 43 | 96  | 13588 | 9.875    | 1        | 0.318836 | 40.86381 |
| GOTERM_BFGO:004508innate in | 3 | 6.122449 | 0.043125 | 43 | 107 | 13588 | 8.859813 | 1        | 0.352877 | 47.38529 |
| GOTERM_BFGO:003166response  | 3 | 6.122449 | 0.049087 | 43 | 115 | 13588 | 8.243478 | 1        | 0.380899 | 51.96399 |
| GOTERM_BFGO:000681sodium ic | 3 | 6.122449 | 0.056933 | 43 | 125 | 13588 | 7.584    | 1        | 0.411685 | 57.4254  |
| GOTERM_BFGO:000225immune ef | 3 | 6.122449 | 0.057741 | 43 | 126 | 13588 | 7.52381  | 1        | 0.411055 | 57.95339 |
| GOTERM_BFGO:000999response  | 3 | 6.122449 | 0.063505 | 43 | 133 | 13588 | 7.12782  | 1        | 0.437083 | 61.5487  |
| GOTERM_BFGO:000681potassium | 3 | 6.122449 | 0.087403 | 43 | 160 | 13588 | 5.925    | 1        | 0.523481 | 73.61447 |
| GOTERM_BFGO:003019negative  | 2 | 4.081633 | 0.018406 | 43 | 6   | 13588 | 105.3333 | 0.999958 | 0.209113 | 23.71027 |
| GOTERM_BFGO:00311Corgan reg | 2 | 4.081633 | 0.018406 | 43 | 6   | 13588 | 105.3333 | 0.999958 | 0.209113 | 23.71027 |
| GOTERM_BFGO:005081negative  | 2 | 4.081633 | 0.027485 | 43 | 9   | 13588 | 70.22222 | 1        | 0.280347 | 33.36849 |
| GOTERM_BFGO:000695complemer | 2 | 4.081633 | 0.030493 | 43 | 10  | 13588 | 63.2     | 1        | 0.290485 | 36.30853 |



|                              |   |          |          |    |    |       |          |   |          |          |
|------------------------------|---|----------|----------|----|----|-------|----------|---|----------|----------|
| GOTERM_BF GO:000292regulatic | 2 | 4.081633 | 0.036482 | 43 | 12 | 13588 | 52.66667 | 1 | 0.321641 | 41.80574 |
| GOTERM_BF GO:000289positive  | 2 | 4.081633 | 0.042435 | 43 | 14 | 13588 | 45.14286 | 1 | 0.353396 | 46.82919 |
| GOTERM_BF GO:000271positive  | 2 | 4.081633 | 0.042435 | 43 | 14 | 13588 | 45.14286 | 1 | 0.353396 | 46.82919 |
| GOTERM_BF GO:000267regulatic | 2 | 4.081633 | 0.054232 | 43 | 18 | 13588 | 35.11111 | 1 | 0.406676 | 55.61439 |
| GOTERM_BF GO:000704lysosome  | 2 | 4.081633 | 0.065888 | 43 | 22 | 13588 | 28.72727 | 1 | 0.444267 | 62.95003 |
| GOTERM_BF GO:005076positive  | 2 | 4.081633 | 0.06878  | 43 | 23 | 13588 | 27.47826 | 1 | 0.4486   | 64.58635 |
| GOTERM_BF GO:005076regulatic | 2 | 4.081633 | 0.074538 | 43 | 25 | 13588 | 25.28    | 1 | 0.471284 | 67.6457  |
| GOTERM_BF GO:000288regulatic | 2 | 4.081633 | 0.088781 | 43 | 30 | 13588 | 21.06667 | 1 | 0.524034 | 74.1887  |
| GOTERM_BF GO:000271regulatic | 2 | 4.081633 | 0.088781 | 43 | 30 | 13588 | 21.06667 | 1 | 0.524034 | 74.1887  |
| GOTERM_BF GO:000695complemer | 2 | 4.081633 | 0.088781 | 43 | 30 | 13588 | 21.06667 | 1 | 0.524034 | 74.1887  |

### Supporting Information Tables 3

#### KEGG pathways of 346 proteins in mice urine

| Category Term                                          | Count | %        | PValue   | List | Pop | Hits | Pop | Total | Fold     | Enri     | Bonferroni | Benjamini | FDR |
|--------------------------------------------------------|-------|----------|----------|------|-----|------|-----|-------|----------|----------|------------|-----------|-----|
| KEGG_PATH:mmu04142:Lysosome                            | 31    | 9.117647 | 5.55E-22 | 154  |     | 119  |     | 5738  | 9.706319 | 6.38E-20 | 6.38E-20   | 6.32E-19  |     |
| KEGG_PATH:mmu04610:Complement and coagulation cascades | 20    | 5.882353 | 3.23E-14 | 154  |     | 75   |     | 5738  | 9.935931 | 3.72E-12 | 1.86E-12   | 3.68E-11  |     |
| KEGG_PATH:mmu00511:Other glycan degradation            | 7     | 2.058824 | 2.09E-06 | 154  |     | 16   |     | 5738  | 16.30114 | 2.41E-04 | 8.02E-05   | 0.002384  |     |
| KEGG_PATH:mmu00531:Glycosaminoglycan degradation       | 7     | 2.058824 | 2.26E-05 | 154  |     | 23   |     | 5738  | 11.33992 | 0.002595 | 6.49E-04   | 0.025737  |     |
| KEGG_PATH:mmu04614:Renin-angiotensin system            | 6     | 1.764706 | 8.17E-05 | 154  |     | 18   |     | 5738  | 12.41991 | 0.009352 | 0.001877   | 0.09302   |     |
| KEGG_PATH:mmu04514:Cell adhesion molecules (CAMs)      | 14    | 4.117647 | 2.11E-04 | 154  |     | 154  |     | 5738  | 3.387249 | 0.02395  | 0.004032   | 0.23982   |     |
| KEGG_PATH:mmu00010:Glycolysis / Gluconeogenesis        | 8     | 2.352941 | 0.002072 | 154  |     | 68   |     | 5738  | 4.383499 | 0.212189 | 0.033497   | 2.334647  |     |
| KEGG_PATH:mmu04512:ECM-receptor interaction            | 8     | 2.352941 | 0.006367 | 154  |     | 83   |     | 5738  | 3.5913   | 0.520273 | 0.087728   | 7.017266  |     |
| KEGG_PATH:mmu00480:Glutathione metabolism              | 6     | 1.764706 | 0.01197  | 154  |     | 52   |     | 5738  | 4.299201 | 0.749644 | 0.14262    | 12.81799  |     |
| KEGG_PATH:mmu00600:Sphingolipid metabolism             | 5     | 1.470588 | 0.024799 | 154  |     | 42   |     | 5738  | 4.435683 | 0.944305 | 0.250828   | 24.87709  |     |
| KEGG_PATH:mmu04520:Adherens junction                   | 6     | 1.764706 | 0.051402 | 154  |     | 76   |     | 5738  | 2.941558 | 0.997686 | 0.424024   | 45.17898  |     |
| KEGG_PATH:mmu00500:Starch and sucrose metabolism       | 4     | 1.176471 | 0.069989 | 154  |     | 36   |     | 5738  | 4.139971 | 0.999762 | 0.501104   | 56.24244  |     |
| KEGG_PATH:mmu04510:Focal adhesion                      | 10    | 2.941176 | 0.081439 | 154  |     | 198  |     | 5738  | 1.881805 | 0.999943 | 0.528318   | 62.00105  |     |

#### Supporting Information Tables 4

##### KEGG pathways of 50 up-regulated proteins in mice urine

| Category Term       | Count | %        | PValue   | List | TotalPop | Hits | Pop  | TotalFold | EnriBonferror | Benjamini | FDR      |
|---------------------|-------|----------|----------|------|----------|------|------|-----------|---------------|-----------|----------|
| KEGG_PATH:mmu04610: | 7     | 14.28571 | 9.66E-08 |      | 20       | 75   | 5738 | 26.77733  | 1.64E-06      | 1.64E-06  | 6.99E-05 |
| KEGG_PATH:mmu04514: | 3     | 6.122449 | 0.090879 |      | 20       | 154  | 5738 | 5.588961  | 0.802045      | 0.555079  | 49.83527 |

## Supporting Information Tables 5

### Sub-cellular distributions of 346 proteins in mice urine

| Category           | Term      | Count | %         | PValue   | List | TotalPop | Hits | Pop   | TotalFold | EnriBonferror | Benjamini | FDR      |
|--------------------|-----------|-------|-----------|----------|------|----------|------|-------|-----------|---------------|-----------|----------|
| GOTERM_CCGO:001602 | membrane  | 147   | 43.23529  | 0.007336 |      | 256      | 7536 | 15227 | 1.160248  | 0.287301      | 0.036934  | 6.722686 |
| GOTERM_CCGO:004442 | membrane  | 130   | 38.23529  | 0.066561 |      | 256      | 6965 | 15227 | 1.110188  | 0.957933      | 0.232058  | 47.8498  |
| GOTERM_CCGO:004442 | extracell | 64    | 18.82353  | 1.15E-26 |      | 256      | 774  | 15227 | 4.918282  | 5.31E-25      | 2.66E-25  | 1.09E-23 |
| GOTERM_CCGO:000561 | extracell | 56    | 16.47059  | 3.22E-29 |      | 256      | 511  | 15227 | 6.518408  | 1.48E-27      | 1.48E-27  | 3.05E-26 |
| GOTERM_CCGO:003198 | vesicle   | 25    | 7.352941  | 7.03E-06 |      | 256      | 519  | 15227 | 2.865148  | 3.23E-04      | 8.09E-05  | 0.006648 |
| GOTERM_CCGO:000026 | cell frac | 21    | 6.176471  | 0.002544 |      | 256      | 596  | 15227 | 2.095788  | 0.110583      | 0.014542  | 2.379182 |
| GOTERM_CCGO:004517 | apical pe | 19    | 5.588235  | 1.23E-11 |      | 256      | 136  | 15227 | 8.309771  | 5.68E-10      | 1.89E-10  | 1.17E-08 |
| GOTERM_CCGO:004299 | cell pro  | 18    | 5.294118  | 0.016877 |      | 256      | 575  | 15227 | 1.861997  | 0.542953      | 0.07531   | 14.86056 |
| GOTERM_CCGO:000998 | cell surf | 17    | 5.578E-05 |          |      | 256      | 305  | 15227 | 3.315305  | 0.002656      | 5.32E-04  | 0.054638 |
| GOTERM_CCGO:003101 | extracell | 15    | 4.411765  | 7.35E-04 |      | 256      | 309  | 15227 | 2.887401  | 0.033236      | 0.005618  | 0.692105 |
| GOTERM_CCGO:004442 | extracell | 8     | 2.352941  | 8.89E-04 |      | 256      | 92   | 15227 | 5.172215  | 0.040067      | 0.005825  | 0.83671  |
| GOTERM_CCGO:003435 | plasma li | 3     | 0.882353  | 0.074566 |      | 256      | 27   | 15227 | 6.608941  | 0.971693      | 0.239822  | 51.92652 |
| GOTERM_CCGO:003299 | protein-l | 3     | 0.882353  | 0.074566 |      | 256      | 27   | 15227 | 6.608941  | 0.971693      | 0.239822  | 51.92652 |
| GOTERM_CCGO:000557 | fibrinoge | 2     | 0.588235  | 0.049406 |      | 256      | 3    | 15227 | 39.65365  | 0.902777      | 0.190943  | 38.05411 |
| GOTERM_CCGO:003125 | trailing  | 2     | 0.588235  | 0.080985 |      | 256      | 5    | 15227 | 23.79219  | 0.979449      | 0.242316  | 54.9877  |

## Supporting Information Tables 6

### Sub-cellular distributions of 50 up-regulated proteins in mice urine

| Category           | Term      | Count | %        | PValue   | List | TotalPop | Hits  | Pop      | TotalFold | EnriBonferror | Benjamini | FDR |
|--------------------|-----------|-------|----------|----------|------|----------|-------|----------|-----------|---------------|-----------|-----|
| GOTERM_CCGO:000561 | extracell | 17    | 34.69388 | 8.12E-15 | 37   | 511      | 15223 | 13.68758 | 3.65E-13  | 3.65E-13      | 7.63E-12  |     |
| GOTERM_CCGO:000588 | plasma me | 15    | 30.61224 | 0.004529 | 37   | 2906     | 15223 | 2.123705 | 0.184771  | 0.0971        | 4.179441  |     |
| GOTERM_CCGO:004445 | plasma me | 9     | 18.36735 | 0.03391  | 37   | 1633     | 15223 | 2.267539 | 0.788268  | 0.403979      | 27.70653  |     |
| GOTERM_CCGO:001646 | proton-tr | 2     | 4.081633 | 0.094778 | 37   | 42       | 15223 | 19.59202 | 0.988677  | 0.673793      | 60.79792  |     |

## Supporting Information Tables 7

### Biological processes of 318 proteins in human urine

| Category           | Term      | Count | %        | PValue   | List | TotalPop | Hits | Pop   | TotalFold | EnriBonferror | Benjamini | FDR      |          |
|--------------------|-----------|-------|----------|----------|------|----------|------|-------|-----------|---------------|-----------|----------|----------|
| GOTERM_BFGO:000715 | cell adhe | 53    | 17.0418  | 3.14E-17 |      | 266      | 700  | 13528 | 3.850612  | 6.61E-14      | 6.61E-14  | 5.43E-14 |          |
| GOTERM_BFGO:002261 | biologica | 53    | 17.0418  | 3.33E-17 |      | 266      | 701  | 13528 | 3.845119  | 7.02E-14      | 3.51E-14  | 5.77E-14 |          |
| GOTERM_BFGO:000650 | proteolys | 43    | 13.82637 | 7.41E-06 |      | 266      | 1054 | 13528 | 2.074817  | 0.015476      | 4.73E-04  | 0.012815 |          |
| GOTERM_BFGO:000961 | response  | 42    | 13.50482 | 3.41E-14 |      | 266      | 530  | 13528 | 4.030189  | 7.17E-11      | 2.39E-11  | 5.90E-11 |          |
| GOTERM_BFGO:001003 | response  | 40    | 12.86174 | 7.08E-09 |      | 266      | 721  | 13528 | 2.821478  | 1.49E-05      | 1.49E-06  | 1.22E-05 |          |
| GOTERM_BFGO:000695 | immune re | 35    | 11.25402 | 6.49E-07 |      | 266      | 690  | 13528 | 2.57971   | 0.001365      | 6.83E-05  | 0.001123 |          |
| GOTERM_BFGO:000695 | defense r | 32    | 10.28939 | 1.31E-06 |      | 266      | 615  | 13528 | 2.646225  | 0.002759      | 1.10E-04  | 0.00227  |          |
| GOTERM_BFGO:004259 | homeostat | 24    | 7.717042 | 0.022552 |      | 266      | 751  | 13528 | 1.625262  |               | 1         | 0.247319 | 32.59982 |
| GOTERM_BFGO:004298 | regulatic | 24    | 7.717042 | 0.043993 |      | 266      | 804  | 13528 | 1.518124  |               | 1         | 0.36714  | 54.07412 |
| GOTERM_BFGO:004306 | regulatic | 24    | 7.717042 | 0.04815  |      | 266      | 812  | 13528 | 1.503167  |               | 1         | 0.384555 | 57.40866 |
| GOTERM_BFGO:001094 | regulatic | 24    | 7.717042 | 0.049719 |      | 266      | 815  | 13528 | 1.497634  |               | 1         | 0.390249 | 58.60696 |
| GOTERM_BFGO:000695 | inflammat | 23    | 7.395498 | 4.36E-07 |      | 266      | 325  | 13528 | 3.599121  | 9.18E-04      | 5.10E-05  | 7.54E-04 |          |
| GOTERM_BFGO:004212 | regulatic | 23    | 7.395498 | 0.059172 |      | 266      | 787  | 13528 | 1.486295  |               | 1         | 0.425023 | 65.17959 |
| GOTERM_BFGO:000999 | response  | 21    | 6.752412 | 1.22E-08 |      | 266      | 220  | 13528 | 4.854545  | 2.56E-05      | 2.33E-06  | 2.10E-05 |          |
| GOTERM_BFGO:000692 | cell moti | 21    | 6.752412 | 0.001093 |      | 266      | 475  | 13528 | 2.248421  | 0.899909      | 0.024189  | 1.873423 |          |
| GOTERM_BFGO:004306 | extracell | 20    | 6.430868 | 4.43E-10 |      | 266      | 163  | 13528 | 6.24014   | 9.32E-07      | 1.55E-07  | 7.66E-07 |          |
| GOTERM_BFGO:004206 | wound hea | 19    | 6.109325 | 3.85E-08 |      | 266      | 191  | 13528 | 5.059088  | 8.11E-05      | 6.24E-06  | 6.66E-05 |          |
| GOTERM_BFGO:003166 | response  | 19    | 6.109325 | 6.19E-08 |      | 266      | 197  | 13528 | 4.905004  | 1.30E-04      | 9.31E-06  | 1.07E-04 |          |
| GOTERM_BFGO:001003 | response  | 19    | 6.109325 | 1.13E-07 |      | 266      | 205  | 13528 | 4.713589  | 2.39E-04      | 1.49E-05  | 1.96E-04 |          |
| GOTERM_BFGO:004858 | positive  | 19    | 6.109325 | 9.21E-07 |      | 266      | 236  | 13528 | 4.094431  | 0.001937      | 9.23E-05  | 0.001593 |          |
| GOTERM_BFGO:000268 | positive  | 19    | 6.109325 | 1.04E-06 |      | 266      | 238  | 13528 | 4.060024  | 0.002193      | 9.54E-05  | 0.001803 |          |
| GOTERM_BFGO:000971 | response  | 19    | 6.109325 | 0.001061 |      | 266      | 405  | 13528 | 2.385891  | 0.893012      | 0.023746  | 1.81968  |          |
| GOTERM_BFGO:000972 | response  | 18    | 5.787781 | 9.21E-04 |      | 266      | 367  | 13528 | 2.494356  | 0.856209      | 0.021555  | 1.580894 |          |
| GOTERM_BFGO:001972 | cellular  | 18    | 5.787781 | 0.010488 |      | 266      | 466  | 13528 | 1.964439  |               | 1         | 0.144695 | 16.66997 |
| GOTERM_BFGO:004887 | chemical  | 18    | 5.787781 | 0.023693 |      | 266      | 512  | 13528 | 1.787946  |               | 1         | 0.256883 | 33.94742 |
| GOTERM_BFGO:003019 | extracell | 17    | 5.466238 | 1.70E-10 |      | 266      | 104  | 13528 | 8.313187  | 3.58E-07      | 8.95E-08  | 2.94E-07 |          |
| GOTERM_BFGO:001605 | carbohydr | 17    | 5.466238 | 3.50E-10 |      | 266      | 109  | 13528 | 7.931848  | 7.37E-07      | 1.47E-07  | 6.06E-07 |          |
| GOTERM_BFGO:005087 | regulatic | 17    | 5.466238 | 1.62E-08 |      | 266      | 141  | 13528 | 6.131712  | 3.40E-05      | 2.83E-06  | 2.79E-05 |          |
| GOTERM_BFGO:000599 | monosacch | 17    | 5.466238 | 7.77E-06 |      | 266      | 222  | 13528 | 3.894466  | 0.01623       | 4.81E-04  | 0.013444 |          |
| GOTERM_BFGO:001633 | cell-cell | 17    | 5.466238 | 1.10E-04 |      | 266      | 276  | 13528 | 3.132505  | 0.207298      | 0.00374   | 0.190696 |          |
| GOTERM_BFGO:005081 | coagulati | 16    | 5.144695 | 1.23E-09 |      | 266      | 102  | 13528 | 7.977591  | 2.59E-06      | 3.70E-07  | 2.13E-06 |          |
| GOTERM_BFGO:000759 | blood coa | 16    | 5.144695 | 1.23E-09 |      | 266      | 102  | 13528 | 7.977591  | 2.59E-06      | 3.70E-07  | 2.13E-06 |          |
| GOTERM_BFGO:000759 | hemostasi | 16    | 5.144695 | 2.78E-09 |      | 266      | 108  | 13528 | 7.534392  | 5.85E-06      | 7.32E-07  | 4.81E-06 |          |

|                    |           |    |          |          |     |     |       |          |          |          |          |
|--------------------|-----------|----|----------|----------|-----|-----|-------|----------|----------|----------|----------|
| GOTERM_BFGO:003210 | regulatic | 16 | 5.144695 | 5.29E-07 | 266 | 159 | 13528 | 5.1177   | 0.001112 | 5.86E-05 | 9.14E-04 |
| GOTERM_BFGO:001931 | hexose me | 16 | 5.144695 | 5.67E-06 | 266 | 192 | 13528 | 4.238095 | 0.011864 | 3.85E-04 | 0.009806 |
| GOTERM_BFGO:000156 | blood ves | 16 | 5.144695 | 9.86E-05 | 266 | 245 | 13528 | 3.321283 | 0.187428 | 0.003453 | 0.17039  |
| GOTERM_BFGO:000194 | vasculatu | 16 | 5.144695 | 1.29E-04 | 266 | 251 | 13528 | 3.24189  | 0.237858 | 0.004302 | 0.222932 |
| GOTERM_BFGO:001064 | positive  | 16 | 5.144695 | 0.002152 | 266 | 329 | 13528 | 2.473296 | 0.989268 | 0.040028 | 3.657276 |
| GOTERM_BFGO:004306 | negative  | 16 | 5.144695 | 0.00424  | 266 | 354 | 13528 | 2.298628 | 0.99987  | 0.069593 | 7.085801 |
| GOTERM_BFGO:004306 | negative  | 16 | 5.144695 | 0.004818 | 266 | 359 | 13528 | 2.266614 | 0.999962 | 0.077518 | 8.014136 |
| GOTERM_BFGO:006054 | negative  | 16 | 5.144695 | 0.004962 | 266 | 360 | 13528 | 2.260317 | 0.999972 | 0.078546 | 8.243636 |
| GOTERM_BFGO:000962 | response  | 16 | 5.144695 | 0.00605  | 266 | 368 | 13528 | 2.21118  | 0.999997 | 0.092906 | 9.963587 |
| GOTERM_BFGO:000828 | cell prol | 16 | 5.144695 | 0.025026 | 266 | 436 | 13528 | 1.866317 | 1        | 0.264064 | 35.49065 |
| GOTERM_BFGO:004232 | regulatic | 16 | 5.144695 | 0.041453 | 266 | 466 | 13528 | 1.746168 | 1        | 0.356721 | 51.91716 |
| GOTERM_BFGO:003226 | regulatic | 16 | 5.144695 | 0.047342 | 266 | 474 | 13528 | 1.716697 | 1        | 0.382182 | 56.77885 |
| GOTERM_BFGO:005117 | regulatic | 16 | 5.144695 | 0.05487  | 266 | 485 | 13528 | 1.677761 | 1        | 0.412981 | 62.32081 |
| GOTERM_BFGO:001922 | regulatic | 16 | 5.144695 | 0.05487  | 266 | 485 | 13528 | 1.677761 | 1        | 0.412981 | 62.32081 |
| GOTERM_BFGO:004308 | positive  | 16 | 5.144695 | 0.087127 | 266 | 520 | 13528 | 1.564835 | 1        | 0.528816 | 79.33385 |
| GOTERM_BFGO:000252 | acute inf | 15 | 4.823151 | 6.54E-09 | 266 | 98  | 13528 | 7.784257 | 1.38E-05 | 1.53E-06 | 1.13E-05 |
| GOTERM_BFGO:005077 | positive  | 15 | 4.823151 | 9.61E-07 | 266 | 145 | 13528 | 5.261084 | 0.002022 | 9.20E-05 | 0.001663 |
| GOTERM_BFGO:000996 | positive  | 15 | 4.823151 | 0.002073 | 266 | 295 | 13528 | 2.585956 | 0.987316 | 0.038926 | 3.524914 |
| GOTERM_BFGO:004000 | regulatic | 15 | 4.823151 | 0.007493 | 266 | 341 | 13528 | 2.237118 | 1        | 0.113024 | 12.19779 |
| GOTERM_BFGO:001003 | response  | 14 | 4.501608 | 1.45E-06 | 266 | 129 | 13528 | 5.51938  | 0.003054 | 1.18E-04 | 0.002513 |
| GOTERM_BFGO:000758 | response  | 14 | 4.501608 | 3.66E-06 | 266 | 140 | 13528 | 5.085714 | 0.00767  | 2.75E-04 | 0.006326 |
| GOTERM_BFGO:000600 | glucose n | 14 | 4.501608 | 9.73E-06 | 266 | 153 | 13528 | 4.653595 | 0.020279 | 5.54E-04 | 0.016833 |
| GOTERM_BFGO:004854 | response  | 14 | 4.501608 | 1.06E-04 | 266 | 192 | 13528 | 3.708333 | 0.199229 | 0.003636 | 0.18239  |
| GOTERM_BFGO:000716 | enzyme li | 14 | 4.501608 | 0.017379 | 266 | 342 | 13528 | 2.081871 | 1        | 0.208299 | 26.15693 |
| GOTERM_BFGO:000687 | cellular  | 14 | 4.501608 | 0.03335  | 266 | 374 | 13528 | 1.903743 | 1        | 0.311897 | 44.38156 |
| GOTERM_BFGO:005508 | cellular  | 14 | 4.501608 | 0.036843 | 266 | 380 | 13528 | 1.873684 | 1        | 0.331793 | 47.75704 |
| GOTERM_BFGO:005080 | ion homec | 14 | 4.501608 | 0.059883 | 266 | 409 | 13528 | 1.740831 | 1        | 0.42621  | 65.63164 |
| GOTERM_BFGO:000225 | immune ef | 13 | 4.180064 | 1.26E-05 | 266 | 134 | 13528 | 4.933902 | 0.02617  | 6.80E-04 | 0.021787 |
| GOTERM_BFGO:004508 | innate in | 13 | 4.180064 | 1.70E-05 | 266 | 138 | 13528 | 4.79089  | 0.035124 | 8.31E-04 | 0.029374 |
| GOTERM_BFGO:001087 | lipid loc | 13 | 4.180064 | 6.11E-05 | 266 | 157 | 13528 | 4.211101 | 0.120715 | 0.002471 | 0.105647 |
| GOTERM_BFGO:005124 | negative  | 13 | 4.180064 | 9.31E-05 | 266 | 164 | 13528 | 4.031359 | 0.178038 | 0.003318 | 0.160966 |
| GOTERM_BFGO:000691 | anti-apof | 13 | 4.180064 | 7.58E-04 | 266 | 206 | 13528 | 3.209431 | 0.797396 | 0.019051 | 1.303212 |
| GOTERM_BFGO:004851 | blood ves | 13 | 4.180064 | 9.35E-04 | 266 | 211 | 13528 | 3.133378 | 0.860413 | 0.021641 | 1.604884 |
| GOTERM_BFGO:005124 | positive  | 13 | 4.180064 | 0.003158 | 266 | 244 | 13528 | 2.709602 | 0.998717 | 0.055787 | 5.324267 |
| GOTERM_BFGO:003000 | cellular  | 13 | 4.180064 | 0.004374 | 266 | 254 | 13528 | 2.602925 | 0.999902 | 0.071157 | 7.301114 |
| GOTERM_BFGO:005508 | cation hc | 13 | 4.180064 | 0.010855 | 266 | 286 | 13528 | 2.311688 | 1        | 0.147468 | 17.20245 |

|                              |    |          |          |     |     |       |          |          |          |          |
|------------------------------|----|----------|----------|-----|-----|-------|----------|----------|----------|----------|
| GOTERM_BFGO:003015regulatic  | 12 | 3.858521 | 7.94E-05 | 266 | 137 | 13528 | 4.45464  | 0.153871 | 0.002979 | 0.137192 |
| GOTERM_BFGO:005118cofactor   | 12 | 3.858521 | 0.001614 | 266 | 195 | 13528 | 3.12967  | 0.966612 | 0.03216  | 2.754622 |
| GOTERM_BFGO:005167localizat  | 12 | 3.858521 | 0.039537 | 266 | 307 | 13528 | 1.987901 | 1        | 0.345955 | 50.22805 |
| GOTERM_BFGO:004887cell moti  | 12 | 3.858521 | 0.039537 | 266 | 307 | 13528 | 1.987901 | 1        | 0.345955 | 50.22805 |
| GOTERM_BFGO:000609generatic  | 12 | 3.858521 | 0.044657 | 266 | 313 | 13528 | 1.949795 | 1        | 0.370192 | 54.62297 |
| GOTERM_BFGO:000828negative   | 12 | 3.858521 | 0.098361 | 266 | 361 | 13528 | 1.690542 | 1        | 0.55794  | 83.3181  |
| GOTERM_BFGO:005160protein n  | 11 | 3.536977 | 6.71E-06 | 266 | 86  | 13528 | 6.504983 | 0.014034 | 4.42E-04 | 0.011613 |
| GOTERM_BFGO:000225activatic  | 11 | 3.536977 | 1.49E-05 | 266 | 94  | 13528 | 5.951368 | 0.030969 | 7.67E-04 | 0.025845 |
| GOTERM_BFGO:000756aging      | 11 | 3.536977 | 5.89E-05 | 266 | 110 | 13528 | 5.085714 | 0.116653 | 0.002429 | 0.101865 |
| GOTERM_BFGO:000597polysacch  | 11 | 3.536977 | 6.37E-05 | 266 | 111 | 13528 | 5.039897 | 0.125414 | 0.002525 | 0.110045 |
| GOTERM_BFGO:001648protein p  | 11 | 3.536977 | 6.87E-05 | 266 | 112 | 13528 | 4.994898 | 0.13467  | 0.002675 | 0.118778 |
| GOTERM_BFGO:005160protein n  | 11 | 3.536977 | 1.41E-04 | 266 | 122 | 13528 | 4.58548  | 0.256856 | 0.004488 | 0.243625 |
| GOTERM_BFGO:000686lipid tra  | 11 | 3.536977 | 5.70E-04 | 266 | 145 | 13528 | 3.858128 | 0.698577 | 0.015454 | 0.980527 |
| GOTERM_BFGO:003000cellular   | 11 | 3.536977 | 0.014102 | 266 | 227 | 13528 | 2.464443 | 1        | 0.178548 | 21.77969 |
| GOTERM_BFGO:006042epithelitu | 11 | 3.536977 | 0.014102 | 266 | 227 | 13528 | 2.464443 | 1        | 0.178548 | 21.77969 |
| GOTERM_BFGO:005506di-, tri-  | 11 | 3.536977 | 0.019244 | 266 | 239 | 13528 | 2.340705 | 1        | 0.223138 | 28.54413 |
| GOTERM_BFGO:001647cell migr  | 11 | 3.536977 | 0.04565  | 266 | 276 | 13528 | 2.026915 | 1        | 0.375373 | 55.43171 |
| GOTERM_BFGO:000150skeletal   | 11 | 3.536977 | 0.095369 | 266 | 319 | 13528 | 1.753695 | 1        | 0.553032 | 82.33421 |
| GOTERM_BFGO:000695complemer  | 10 | 3.215434 | 9.40E-08 | 266 | 42  | 13528 | 12.10884 | 1.98E-04 | 1.32E-05 | 1.63E-04 |
| GOTERM_BFGO:000254activatic  | 10 | 3.215434 | 1.17E-07 | 266 | 43  | 13528 | 11.82724 | 2.46E-04 | 1.45E-05 | 2.02E-04 |
| GOTERM_BFGO:000602aminoglyc  | 10 | 3.215434 | 4.55E-06 | 266 | 65  | 13528 | 7.824176 | 0.009524 | 3.30E-04 | 0.007862 |
| GOTERM_BFGO:000244lymphocyt  | 10 | 3.215434 | 8.49E-06 | 266 | 70  | 13528 | 7.265306 | 0.017717 | 5.11E-04 | 0.014687 |
| GOTERM_BFGO:000246adaptive   | 10 | 3.215434 | 1.87E-05 | 266 | 77  | 13528 | 6.604824 | 0.03859  | 8.94E-04 | 0.03233  |
| GOTERM_BFGO:000225adaptive   | 10 | 3.215434 | 1.87E-05 | 266 | 77  | 13528 | 6.604824 | 0.03859  | 8.94E-04 | 0.03233  |
| GOTERM_BFGO:000695humoral i  | 10 | 3.215434 | 2.31E-05 | 266 | 79  | 13528 | 6.437613 | 0.047366 | 0.001078 | 0.039863 |
| GOTERM_BFGO:004616alcohol c  | 10 | 3.215434 | 2.82E-05 | 266 | 81  | 13528 | 6.27866  | 0.057718 | 0.001264 | 0.048836 |
| GOTERM_BFGO:004427cellular   | 10 | 3.215434 | 4.16E-05 | 266 | 85  | 13528 | 5.983193 | 0.083916 | 0.001787 | 0.07199  |
| GOTERM_BFGO:000244leukocyte  | 10 | 3.215434 | 4.57E-05 | 266 | 86  | 13528 | 5.913621 | 0.091754 | 0.001923 | 0.079045 |
| GOTERM_BFGO:000854epidermis  | 10 | 3.215434 | 0.010381 | 266 | 184 | 13528 | 2.763975 | 1        | 0.144256 | 16.51326 |
| GOTERM_BFGO:005127regulatic  | 10 | 3.215434 | 0.01386  | 266 | 193 | 13528 | 2.635085 | 1        | 0.176811 | 21.44752 |
| GOTERM_BFGO:000739ectoderm   | 10 | 3.215434 | 0.016617 | 266 | 199 | 13528 | 2.555635 | 1        | 0.20237  | 25.16058 |
| GOTERM_BFGO:000996negative   | 10 | 3.215434 | 0.030231 | 266 | 221 | 13528 | 2.301228 | 1        | 0.297494 | 41.19462 |
| GOTERM_BFGO:005105positive   | 10 | 3.215434 | 0.031718 | 266 | 223 | 13528 | 2.280589 | 1        | 0.30429  | 42.73485 |
| GOTERM_BFGO:000716transmemt  | 10 | 3.215434 | 0.032301 | 266 | 224 | 13528 | 2.270408 | 1        | 0.306285 | 43.32854 |
| GOTERM_BFGO:001064negative   | 10 | 3.215434 | 0.0555   | 266 | 248 | 13528 | 2.050691 | 1        | 0.415255 | 62.7524  |
| GOTERM_BFGO:001062regulatic  | 10 | 3.215434 | 0.056714 | 266 | 249 | 13528 | 2.042456 | 1        | 0.420873 | 63.57231 |



|                    |           |    |          |          |     |     |       |          |          |          |          |
|--------------------|-----------|----|----------|----------|-----|-----|-------|----------|----------|----------|----------|
| GOTERM_BFGO:005109 | positive  | 10 | 3.215434 | 0.096805 | 266 | 278 | 13528 | 1.829394 | 1        | 0.555957 | 82.81297 |
| GOTERM_BFGO:001606 | immunogl  | 9  | 2.893891 | 9.30E-06 | 266 | 54  | 13528 | 8.47619  | 0.019395 | 5.44E-04 | 0.016091 |
| GOTERM_BFGO:001972 | B cell me | 9  | 2.893891 | 1.23E-05 | 266 | 56  | 13528 | 8.173469 | 0.025519 | 6.80E-04 | 0.021238 |
| GOTERM_BFGO:000926 | response  | 9  | 2.893891 | 2.16E-04 | 266 | 83  | 13528 | 5.51463  | 0.365745 | 0.006673 | 0.373405 |
| GOTERM_BFGO:003196 | response  | 9  | 2.893891 | 2.55E-04 | 266 | 85  | 13528 | 5.384874 | 0.415591 | 0.007537 | 0.440385 |
| GOTERM_BFGO:000716 | cell-matr | 9  | 2.893891 | 3.50E-04 | 266 | 89  | 13528 | 5.142857 | 0.521497 | 0.009911 | 0.603809 |
| GOTERM_BFGO:003158 | cell-sub  | 9  | 2.893891 | 6.71E-04 | 266 | 98  | 13528 | 4.670554 | 0.756441 | 0.017286 | 1.1538   |
| GOTERM_BFGO:000269 | regulatic | 9  | 2.893891 | 8.19E-04 | 266 | 101 | 13528 | 4.531825 | 0.821834 | 0.019859 | 1.407398 |
| GOTERM_BFGO:000152 | angiogene | 9  | 2.893891 | 0.008725 | 266 | 148 | 13528 | 3.092664 | 1        | 0.126843 | 14.06432 |
| GOTERM_BFGO:000673 | coenzyme  | 9  | 2.893891 | 0.010545 | 266 | 153 | 13528 | 2.991597 | 1        | 0.144486 | 16.75297 |
| GOTERM_BFGO:000697 | response  | 9  | 2.893891 | 0.015521 | 266 | 164 | 13528 | 2.790941 | 1        | 0.1925   | 23.70392 |
| GOTERM_BFGO:000269 | regulatic | 9  | 2.893891 | 0.016582 | 266 | 166 | 13528 | 2.757315 | 1        | 0.203142 | 25.11388 |
| GOTERM_BFGO:003033 | regulatic | 9  | 2.893891 | 0.01827  | 266 | 169 | 13528 | 2.708369 | 1        | 0.216605 | 27.307   |
| GOTERM_BFGO:005086 | regulatic | 9  | 2.893891 | 0.021987 | 266 | 175 | 13528 | 2.61551  | 1        | 0.24567  | 31.92313 |
| GOTERM_BFGO:005124 | negative  | 9  | 2.893891 | 0.031025 | 266 | 187 | 13528 | 2.44767  | 1        | 0.301348 | 42.02162 |
| GOTERM_BFGO:005196 | regulatic | 9  | 2.893891 | 0.035469 | 266 | 192 | 13528 | 2.383929 | 1        | 0.324194 | 46.45325 |
| GOTERM_BFGO:004001 | regulatic | 9  | 2.893891 | 0.035469 | 266 | 192 | 13528 | 2.383929 | 1        | 0.324194 | 46.45325 |
| GOTERM_BFGO:000155 | regulatic | 9  | 2.893891 | 0.037395 | 266 | 194 | 13528 | 2.359352 | 1        | 0.334511 | 48.27228 |
| GOTERM_BFGO:004559 | positive  | 9  | 2.893891 | 0.081517 | 266 | 229 | 13528 | 1.998752 | 1        | 0.514094 | 77.0235  |
| GOTERM_BFGO:000695 | complemer | 8  | 2.572347 | 1.10E-06 | 266 | 29  | 13528 | 14.02956 | 0.002321 | 9.68E-05 | 0.001909 |
| GOTERM_BFGO:000245 | humoral i | 8  | 2.572347 | 1.80E-06 | 266 | 31  | 13528 | 13.12442 | 0.003778 | 1.40E-04 | 0.00311  |
| GOTERM_BFGO:003019 | regulatic | 8  | 2.572347 | 5.25E-06 | 266 | 36  | 13528 | 11.30159 | 0.010992 | 3.68E-04 | 0.009081 |
| GOTERM_BFGO:005081 | regulatic | 8  | 2.572347 | 1.30E-05 | 266 | 41  | 13528 | 9.923345 | 0.027007 | 6.84E-04 | 0.022493 |
| GOTERM_BFGO:000609 | pyruvate  | 8  | 2.572347 | 1.53E-05 | 266 | 42  | 13528 | 9.687075 | 0.031794 | 7.69E-04 | 0.026544 |
| GOTERM_BFGO:000609 | glycolysi | 8  | 2.572347 | 3.29E-05 | 266 | 47  | 13528 | 8.656535 | 0.066942 | 0.001442 | 0.056915 |
| GOTERM_BFGO:003020 | glycosami | 8  | 2.572347 | 9.29E-05 | 266 | 55  | 13528 | 7.397403 | 0.177705 | 0.003368 | 0.160634 |
| GOTERM_BFGO:000600 | glucose c | 8  | 2.572347 | 1.31E-04 | 266 | 58  | 13528 | 7.014778 | 0.241021 | 0.004234 | 0.226342 |
| GOTERM_BFGO:001932 | hexose c  | 8  | 2.572347 | 3.92E-04 | 266 | 69  | 13528 | 5.89648  | 0.561481 | 0.010931 | 0.675047 |
| GOTERM_BFGO:004636 | monosacch | 8  | 2.572347 | 4.67E-04 | 266 | 71  | 13528 | 5.730382 | 0.625814 | 0.012851 | 0.80444  |
| GOTERM_BFGO:005138 | response  | 8  | 2.572347 | 8.26E-04 | 266 | 78  | 13528 | 5.216117 | 0.824346 | 0.019793 | 1.418899 |
| GOTERM_BFGO:001974 | secondary | 8  | 2.572347 | 8.91E-04 | 266 | 79  | 13528 | 5.15009  | 0.846962 | 0.021104 | 1.530476 |
| GOTERM_BFGO:000268 | negative  | 8  | 2.572347 | 0.001195 | 266 | 83  | 13528 | 4.901893 | 0.919283 | 0.025613 | 2.046723 |
| GOTERM_BFGO:000715 | homophili | 8  | 2.572347 | 0.014611 | 266 | 131 | 13528 | 3.10578  | 1        | 0.183313 | 22.475   |
| GOTERM_BFGO:003288 | regulatic | 8  | 2.572347 | 0.018929 | 266 | 138 | 13528 | 2.94824  | 1        | 0.221095 | 28.1465  |
| GOTERM_BFGO:005112 | negative  | 8  | 2.572347 | 0.021764 | 266 | 142 | 13528 | 2.865191 | 1        | 0.244758 | 31.65336 |
| GOTERM_BFGO:005124 | regulatic | 8  | 2.572347 | 0.026547 | 266 | 148 | 13528 | 2.749035 | 1        | 0.27253  | 37.20901 |

|                             |   |          |          |     |     |       |          |          |          |          |
|-----------------------------|---|----------|----------|-----|-----|-------|----------|----------|----------|----------|
| GOTERM_BFGO:004648glyceroli | 8 | 2.572347 | 0.040378 | 266 | 162 | 13528 | 2.511464 | 1        | 0.350553 | 50.97586 |
| GOTERM_BFGO:001074positive  | 8 | 2.572347 | 0.046277 | 266 | 167 | 13528 | 2.43627  | 1        | 0.376682 | 55.93555 |
| GOTERM_BFGO:000193regulatic | 8 | 2.572347 | 0.053987 | 266 | 173 | 13528 | 2.351775 | 1        | 0.411998 | 61.70722 |
| GOTERM_BFGO:001604lipid cat | 8 | 2.572347 | 0.053987 | 266 | 173 | 13528 | 2.351775 | 1        | 0.411998 | 61.70722 |
| GOTERM_BFGO:005134positive  | 8 | 2.572347 | 0.062521 | 266 | 179 | 13528 | 2.272945 | 1        | 0.437772 | 67.26203 |
| GOTERM_BFGO:003226negative  | 8 | 2.572347 | 0.064019 | 266 | 180 | 13528 | 2.260317 | 1        | 0.44298  | 68.15519 |
| GOTERM_BFGO:000801blood cir | 8 | 2.572347 | 0.073475 | 266 | 186 | 13528 | 2.187404 | 1        | 0.485113 | 73.28449 |
| GOTERM_BFGO:000301circulatc | 8 | 2.572347 | 0.073475 | 266 | 186 | 13528 | 2.187404 | 1        | 0.485113 | 73.28449 |
| GOTERM_BFGO:000961response  | 8 | 2.572347 | 0.085467 | 266 | 193 | 13528 | 2.108068 | 1        | 0.523083 | 78.67416 |
| GOTERM_BFGO:000940response  | 7 | 2.250804 | 7.63E-04 | 266 | 56  | 13528 | 6.357143 | 0.799429 | 0.018944 | 1.311394 |
| GOTERM_BFGO:004360cellular  | 7 | 2.250804 | 7.63E-04 | 266 | 56  | 13528 | 6.357143 | 0.799429 | 0.018944 | 1.311394 |
| GOTERM_BFGO:004576regulatic | 7 | 2.250804 | 0.001425 | 266 | 63  | 13528 | 5.650794 | 0.950265 | 0.029565 | 2.435682 |
| GOTERM_BFGO:003327response  | 7 | 2.250804 | 0.001814 | 266 | 66  | 13528 | 5.393939 | 0.978137 | 0.035098 | 3.092333 |
| GOTERM_BFGO:003109regenerat | 7 | 2.250804 | 0.00228  | 266 | 69  | 13528 | 5.15942  | 0.991814 | 0.041634 | 3.871451 |
| GOTERM_BFGO:003463cellular  | 7 | 2.250804 | 0.00228  | 266 | 69  | 13528 | 5.15942  | 0.991814 | 0.041634 | 3.871451 |
| GOTERM_BFGO:000666sphingoli | 7 | 2.250804 | 0.003475 | 266 | 75  | 13528 | 4.746667 | 0.999343 | 0.059725 | 5.843753 |
| GOTERM_BFGO:000676vitamin n | 7 | 2.250804 | 0.003475 | 266 | 75  | 13528 | 4.746667 | 0.999343 | 0.059725 | 5.843753 |
| GOTERM_BFGO:005072regulatic | 7 | 2.250804 | 0.003713 | 266 | 76  | 13528 | 4.684211 | 0.999602 | 0.06266  | 6.230856 |
| GOTERM_BFGO:000664membrane  | 7 | 2.250804 | 0.005084 | 266 | 81  | 13528 | 4.395062 | 0.999978 | 0.079803 | 8.43785  |
| GOTERM_BFGO:004232positive  | 7 | 2.250804 | 0.011966 | 266 | 97  | 13528 | 3.670103 | 1        | 0.160337 | 18.79582 |
| GOTERM_BFGO:001056positive  | 7 | 2.250804 | 0.013757 | 266 | 100 | 13528 | 3.56     | 1        | 0.177738 | 21.30462 |
| GOTERM_BFGO:004593positive  | 7 | 2.250804 | 0.013757 | 266 | 100 | 13528 | 3.56     | 1        | 0.177738 | 21.30462 |
| GOTERM_BFGO:004858negative  | 7 | 2.250804 | 0.013757 | 266 | 100 | 13528 | 3.56     | 1        | 0.177738 | 21.30462 |
| GOTERM_BFGO:001605carbohydr | 7 | 2.250804 | 0.018647 | 266 | 107 | 13528 | 3.327103 | 1        | 0.219361 | 27.78807 |
| GOTERM_BFGO:000756female pr | 7 | 2.250804 | 0.021067 | 266 | 110 | 13528 | 3.236364 | 1        | 0.240399 | 30.8061  |
| GOTERM_BFGO:005122regulatic | 7 | 2.250804 | 0.024611 | 266 | 114 | 13528 | 3.122807 | 1        | 0.261554 | 35.01415 |
| GOTERM_BFGO:003284regulatic | 7 | 2.250804 | 0.024611 | 266 | 114 | 13528 | 3.122807 | 1        | 0.261554 | 35.01415 |
| GOTERM_BFGO:000679sulfur me | 7 | 2.250804 | 0.025556 | 266 | 115 | 13528 | 3.095652 | 1        | 0.267578 | 36.09428 |
| GOTERM_BFGO:005086regulatic | 7 | 2.250804 | 0.027517 | 266 | 117 | 13528 | 3.042735 | 1        | 0.279733 | 38.28289 |
| GOTERM_BFGO:007020regulatic | 7 | 2.250804 | 0.031733 | 266 | 121 | 13528 | 2.942149 | 1        | 0.303068 | 42.75036 |
| GOTERM_BFGO:000166response  | 7 | 2.250804 | 0.048249 | 266 | 134 | 13528 | 2.656716 | 1        | 0.383793 | 57.48544 |
| GOTERM_BFGO:003085epitheliæ | 7 | 2.250804 | 0.052693 | 266 | 137 | 13528 | 2.59854  | 1        | 0.405662 | 60.79078 |
| GOTERM_BFGO:007048response  | 7 | 2.250804 | 0.058993 | 266 | 141 | 13528 | 2.524823 | 1        | 0.426785 | 65.06472 |
| GOTERM_BFGO:004343response  | 7 | 2.250804 | 0.082449 | 266 | 154 | 13528 | 2.311688 | 1        | 0.514039 | 77.4234  |
| GOTERM_BFGO:004362cellular  | 7 | 2.250804 | 0.099123 | 266 | 162 | 13528 | 2.197531 | 1        | 0.559524 | 83.56004 |
| GOTERM_BFGO:003019negative  | 6 | 1.92926  | 7.00E-05 | 266 | 23  | 13528 | 13.26708 | 0.137    | 0.002675 | 0.12099  |

|                             |   |          |          |     |     |       |          |          |          |          |
|-----------------------------|---|----------|----------|-----|-----|-------|----------|----------|----------|----------|
| GOTERM_BFGO:005081negative  | 6 | 1.92926  | 1.30E-04 | 266 | 26  | 13528 | 11.73626 | 0.240066 | 0.00428  | 0.225311 |
| GOTERM_BFGO:003019collagen  | 6 | 1.92926  | 2.24E-04 | 266 | 29  | 13528 | 10.52217 | 0.376496 | 0.006823 | 0.3874   |
| GOTERM_BFGO:001931hexose bi | 6 | 1.92926  | 3.11E-04 | 266 | 31  | 13528 | 9.843318 | 0.480381 | 0.008928 | 0.536463 |
| GOTERM_BFGO:000687cellular  | 6 | 1.92926  | 3.11E-04 | 266 | 31  | 13528 | 9.843318 | 0.480381 | 0.008928 | 0.536463 |
| GOTERM_BFGO:005507iron ion  | 6 | 1.92926  | 6.37E-04 | 266 | 36  | 13528 | 8.47619  | 0.73851  | 0.016836 | 1.096088 |
| GOTERM_BFGO:004636monosacch | 6 | 1.92926  | 7.25E-04 | 266 | 37  | 13528 | 8.247104 | 0.782703 | 0.018444 | 1.246423 |
| GOTERM_BFGO:001591sterol tr | 6 | 1.92926  | 7.25E-04 | 266 | 37  | 13528 | 8.247104 | 0.782703 | 0.018444 | 1.246423 |
| GOTERM_BFGO:003030cholester | 6 | 1.92926  | 7.25E-04 | 266 | 37  | 13528 | 8.247104 | 0.782703 | 0.018444 | 1.246423 |
| GOTERM_BFGO:000676nicotinan | 6 | 1.92926  | 0.001043 | 266 | 40  | 13528 | 7.628571 | 0.888885 | 0.0236   | 1.789143 |
| GOTERM_BFGO:004649nicotinan | 6 | 1.92926  | 0.001043 | 266 | 40  | 13528 | 7.628571 | 0.888885 | 0.0236   | 1.789143 |
| GOTERM_BFGO:000982alkaloid  | 6 | 1.92926  | 0.001169 | 266 | 41  | 13528 | 7.442509 | 0.914823 | 0.02533  | 2.003425 |
| GOTERM_BFGO:000667ceramide  | 6 | 1.92926  | 0.001306 | 266 | 42  | 13528 | 7.265306 | 0.936197 | 0.027691 | 2.235795 |
| GOTERM_BFGO:001936pyridine  | 6 | 1.92926  | 0.001306 | 266 | 42  | 13528 | 7.265306 | 0.936197 | 0.027691 | 2.235795 |
| GOTERM_BFGO:003318response  | 6 | 1.92926  | 0.001306 | 266 | 42  | 13528 | 7.265306 | 0.936197 | 0.027691 | 2.235795 |
| GOTERM_BFGO:000716negative  | 6 | 1.92926  | 0.001455 | 266 | 43  | 13528 | 7.096346 | 0.953355 | 0.029604 | 2.487088 |
| GOTERM_BFGO:004616alcohol t | 6 | 1.92926  | 0.001616 | 266 | 44  | 13528 | 6.935065 | 0.966758 | 0.031899 | 2.758127 |
| GOTERM_BFGO:004651sphingoic | 6 | 1.92926  | 0.001789 | 266 | 45  | 13528 | 6.780952 | 0.976935 | 0.034936 | 3.049726 |
| GOTERM_BFGO:001081regulatic | 6 | 1.92926  | 0.001976 | 266 | 46  | 13528 | 6.63354  | 0.984438 | 0.037812 | 3.362681 |
| GOTERM_BFGO:000673oxidoredu | 6 | 1.92926  | 0.003406 | 266 | 52  | 13528 | 5.868132 | 0.99924  | 0.059542 | 5.730774 |
| GOTERM_BFGO:003016regulatic | 6 | 1.92926  | 0.003702 | 266 | 53  | 13528 | 5.757412 | 0.999593 | 0.06299  | 6.213567 |
| GOTERM_BFGO:000651peptide n | 6 | 1.92926  | 0.003702 | 266 | 53  | 13528 | 5.757412 | 0.999593 | 0.06299  | 6.213567 |
| GOTERM_BFGO:004547response  | 6 | 1.92926  | 0.00827  | 266 | 64  | 13528 | 4.767857 | 1        | 0.122303 | 13.37945 |
| GOTERM_BFGO:000698response  | 6 | 1.92926  | 0.012653 | 266 | 71  | 13528 | 4.297787 | 1        | 0.166687 | 19.76778 |
| GOTERM_BFGO:000701actin fil | 6 | 1.92926  | 0.013386 | 266 | 72  | 13528 | 4.238095 | 1        | 0.174427 | 20.7918  |
| GOTERM_BFGO:005127positive  | 6 | 1.92926  | 0.043377 | 266 | 98  | 13528 | 3.113703 | 1        | 0.364374 | 53.5596  |
| GOTERM_BFGO:006024anatomic  | 6 | 1.92926  | 0.057234 | 266 | 106 | 13528 | 2.878706 | 1        | 0.421044 | 63.91766 |
| GOTERM_BFGO:000269positive  | 6 | 1.92926  | 0.057234 | 266 | 106 | 13528 | 2.878706 | 1        | 0.421044 | 63.91766 |
| GOTERM_BFGO:005178response  | 6 | 1.92926  | 0.059125 | 266 | 107 | 13528 | 2.851802 | 1        | 0.426138 | 65.1495  |
| GOTERM_BFGO:000165urogenite | 6 | 1.92926  | 0.065012 | 266 | 110 | 13528 | 2.774026 | 1        | 0.44681  | 68.73451 |
| GOTERM_BFGO:005086positive  | 6 | 1.92926  | 0.067044 | 266 | 111 | 13528 | 2.749035 | 1        | 0.455929 | 69.88957 |
| GOTERM_BFGO:005160detectior | 6 | 1.92926  | 0.082251 | 266 | 118 | 13528 | 2.585956 | 1        | 0.514559 | 77.33907 |
| GOTERM_BFGO:001407response  | 6 | 1.92926  | 0.089283 | 266 | 121 | 13528 | 2.521842 | 1        | 0.535141 | 80.16212 |
| GOTERM_BFGO:003019positive  | 5 | 1.607717 | 2.75E-05 | 266 | 10  | 13528 | 25.42857 | 0.056341 | 0.00126  | 0.047637 |
| GOTERM_BFGO:005082positive  | 5 | 1.607717 | 8.95E-05 | 266 | 13  | 13528 | 19.56044 | 0.171785 | 0.003301 | 0.154749 |
| GOTERM_BFGO:004646membrane  | 5 | 1.607717 | 2.80E-04 | 266 | 17  | 13528 | 14.95798 | 0.445579 | 0.008159 | 0.483467 |
| GOTERM_BFGO:003014sphingoli | 5 | 1.607717 | 2.80E-04 | 266 | 17  | 13528 | 14.95798 | 0.445579 | 0.008159 | 0.483467 |

|                             |   |          |          |     |    |       |          |          |          |          |
|-----------------------------|---|----------|----------|-----|----|-------|----------|----------|----------|----------|
| GOTERM_BFGO:000602aminoglyc | 5 | 1.607717 | 6.62E-04 | 266 | 21 | 13528 | 12.10884 | 0.752114 | 0.017284 | 1.139497 |
| GOTERM_BFGO:004586negative  | 5 | 1.607717 | 7.97E-04 | 266 | 22 | 13528 | 11.55844 | 0.813403 | 0.019557 | 1.369936 |
| GOTERM_BFGO:001652negative  | 5 | 1.607717 | 9.50E-04 | 266 | 23 | 13528 | 11.0559  | 0.864849 | 0.021753 | 1.63099  |
| GOTERM_BFGO:005118vitamin t | 5 | 1.607717 | 0.001123 | 266 | 24 | 13528 | 10.59524 | 0.906069 | 0.024589 | 1.924619 |
| GOTERM_BFGO:000609gluconeog | 5 | 1.607717 | 0.001316 | 266 | 25 | 13528 | 10.17143 | 0.937528 | 0.027622 | 2.252728 |
| GOTERM_BFGO:005077negative  | 5 | 1.607717 | 0.001316 | 266 | 25 | 13528 | 10.17143 | 0.937528 | 0.027622 | 2.252728 |
| GOTERM_BFGO:000668glycosphi | 5 | 1.607717 | 0.001532 | 266 | 26 | 13528 | 9.78022  | 0.960349 | 0.03085  | 2.617154 |
| GOTERM_BFGO:001081positive  | 5 | 1.607717 | 0.002035 | 266 | 28 | 13528 | 9.081633 | 0.986267 | 0.038575 | 3.461893 |
| GOTERM_BFGO:000027polysacch | 5 | 1.607717 | 0.002035 | 266 | 28 | 13528 | 9.081633 | 0.986267 | 0.038575 | 3.461893 |
| GOTERM_BFGO:000666glycolipi | 5 | 1.607717 | 0.002987 | 266 | 31 | 13528 | 8.202765 | 0.998157 | 0.053281 | 5.042101 |
| GOTERM_BFGO:003252response  | 5 | 1.607717 | 0.003767 | 266 | 33 | 13528 | 7.705628 | 0.999646 | 0.063049 | 6.319686 |
| GOTERM_BFGO:005159response  | 5 | 1.607717 | 0.008985 | 266 | 42 | 13528 | 6.054422 | 1        | 0.129487 | 14.45266 |
| GOTERM_BFGO:000602proteogly | 5 | 1.607717 | 0.009757 | 266 | 43 | 13528 | 5.913621 | 1        | 0.138913 | 15.59838 |
| GOTERM_BFGO:000270regulatic | 5 | 1.607717 | 0.021173 | 266 | 54 | 13528 | 4.708995 | 1        | 0.240189 | 30.93651 |
| GOTERM_BFGO:004508regulatic | 5 | 1.607717 | 0.021173 | 266 | 54 | 13528 | 4.708995 | 1        | 0.240189 | 30.93651 |
| GOTERM_BFGO:004254response  | 5 | 1.607717 | 0.023862 | 266 | 56 | 13528 | 4.540816 | 1        | 0.257176 | 34.14481 |
| GOTERM_BFGO:000281regulatic | 5 | 1.607717 | 0.023862 | 266 | 56 | 13528 | 4.540816 | 1        | 0.257176 | 34.14481 |
| GOTERM_BFGO:004578positive  | 5 | 1.607717 | 0.029834 | 266 | 60 | 13528 | 4.238095 | 1        | 0.295531 | 40.77709 |
| GOTERM_BFGO:000270regulatic | 5 | 1.607717 | 0.031453 | 266 | 61 | 13528 | 4.168618 | 1        | 0.303493 | 42.4633  |
| GOTERM_BFGO:005127negative  | 5 | 1.607717 | 0.034843 | 266 | 63 | 13528 | 4.036281 | 1        | 0.320775 | 45.849   |
| GOTERM_BFGO:004561regulatic | 5 | 1.607717 | 0.034843 | 266 | 63 | 13528 | 4.036281 | 1        | 0.320775 | 45.849   |
| GOTERM_BFGO:003166cellular  | 5 | 1.607717 | 0.036615 | 266 | 64 | 13528 | 3.973214 | 1        | 0.331466 | 47.54263 |
| GOTERM_BFGO:003210positive  | 5 | 1.607717 | 0.036615 | 266 | 64 | 13528 | 3.973214 | 1        | 0.331466 | 47.54263 |
| GOTERM_BFGO:000680oxygen ar | 5 | 1.607717 | 0.042236 | 266 | 67 | 13528 | 3.795309 | 1        | 0.360765 | 52.59236 |
| GOTERM_BFGO:004666female se | 5 | 1.607717 | 0.046239 | 266 | 69 | 13528 | 3.6853   | 1        | 0.377837 | 55.90542 |
| GOTERM_BFGO:004654developme | 5 | 1.607717 | 0.046239 | 266 | 69 | 13528 | 3.6853   | 1        | 0.377837 | 55.90542 |
| GOTERM_BFGO:003134positive  | 5 | 1.607717 | 0.054858 | 266 | 73 | 13528 | 3.483366 | 1        | 0.414313 | 62.31208 |
| GOTERM_BFGO:000176morphoger | 5 | 1.607717 | 0.057139 | 266 | 74 | 13528 | 3.436293 | 1        | 0.421901 | 63.8548  |
| GOTERM_BFGO:000030response  | 5 | 1.607717 | 0.05947  | 266 | 75 | 13528 | 3.390476 | 1        | 0.425303 | 65.36991 |
| GOTERM_BFGO:004424cellular  | 5 | 1.607717 | 0.061852 | 266 | 76 | 13528 | 3.345865 | 1        | 0.435553 | 66.85561 |
| GOTERM_BFGO:004858developme | 5 | 1.607717 | 0.091258 | 266 | 87 | 13528 | 2.922824 | 1        | 0.54194  | 80.89288 |
| GOTERM_BFGO:000193positive  | 5 | 1.607717 | 0.097212 | 266 | 89 | 13528 | 2.857143 | 1        | 0.556186 | 82.94639 |
| GOTERM_BFGO:003033positive  | 5 | 1.607717 | 0.097212 | 266 | 89 | 13528 | 2.857143 | 1        | 0.556186 | 82.94639 |
| GOTERM_BFGO:003134regulatic | 5 | 1.607717 | 0.097212 | 266 | 89 | 13528 | 2.857143 | 1        | 0.556186 | 82.94639 |
| GOTERM_BFGO:005191negative  | 4 | 1.286174 | 1.42E-04 | 266 | 6  | 13528 | 33.90476 | 0.258846 | 0.004461 | 0.245822 |
| GOTERM_BFGO:004647glycosphi | 4 | 1.286174 | 2.45E-04 | 266 | 7  | 13528 | 29.06122 | 0.403477 | 0.007353 | 0.4236   |

|                             |   |          |          |     |    |       |          |          |          |          |
|-----------------------------|---|----------|----------|-----|----|-------|----------|----------|----------|----------|
| GOTERM_BFGO:001937glycolipi | 4 | 1.286174 | 2.45E-04 | 266 | 7  | 13528 | 29.06122 | 0.403477 | 0.007353 | 0.4236   |
| GOTERM_BFGO:005191regulatic | 4 | 1.286174 | 5.72E-04 | 266 | 9  | 13528 | 22.60317 | 0.700161 | 0.015324 | 0.984814 |
| GOTERM_BFGO:004668response  | 4 | 1.286174 | 0.001434 | 266 | 12 | 13528 | 16.95238 | 0.951264 | 0.029471 | 2.451944 |
| GOTERM_BFGO:004273fibrinoly | 4 | 1.286174 | 0.001434 | 266 | 12 | 13528 | 16.95238 | 0.951264 | 0.029471 | 2.451944 |
| GOTERM_BFGO:000602glycosami | 4 | 1.286174 | 0.002305 | 266 | 14 | 13528 | 14.53061 | 0.992235 | 0.04172  | 3.913103 |
| GOTERM_BFGO:004369reverse c | 4 | 1.286174 | 0.003445 | 266 | 16 | 13528 | 12.71429 | 0.9993   | 0.05971  | 5.794611 |
| GOTERM_BFGO:000600fructose  | 4 | 1.286174 | 0.004124 | 266 | 17 | 13528 | 11.96639 | 0.999833 | 0.068273 | 6.897418 |
| GOTERM_BFGO:001991lipid stc | 4 | 1.286174 | 0.004877 | 266 | 18 | 13528 | 11.30159 | 0.999966 | 0.077842 | 8.108753 |
| GOTERM_BFGO:000267regulatic | 4 | 1.286174 | 0.007613 | 266 | 21 | 13528 | 9.687075 | 1        | 0.113927 | 12.38179 |
| GOTERM_BFGO:000715heterophi | 4 | 1.286174 | 0.008689 | 266 | 22 | 13528 | 9.246753 | 1        | 0.12723  | 14.0108  |
| GOTERM_BFGO:004205regulatic | 4 | 1.286174 | 0.00985  | 266 | 23 | 13528 | 8.84472  | 1        | 0.139216 | 15.73592 |
| GOTERM_BFGO:001967NAD metal | 4 | 1.286174 | 0.012431 | 266 | 25 | 13528 | 8.137143 | 1        | 0.16502  | 19.45459 |
| GOTERM_BFGO:001059regulatic | 4 | 1.286174 | 0.012431 | 266 | 25 | 13528 | 8.137143 | 1        | 0.16502  | 19.45459 |
| GOTERM_BFGO:001814peptide c | 4 | 1.286174 | 0.013852 | 266 | 26 | 13528 | 7.824176 | 1        | 0.177785 | 21.43655 |
| GOTERM_BFGO:005082protein s | 4 | 1.286174 | 0.016962 | 266 | 28 | 13528 | 7.265306 | 1        | 0.204964 | 25.61277 |
| GOTERM_BFGO:000608cellular  | 4 | 1.286174 | 0.016962 | 266 | 28 | 13528 | 7.265306 | 1        | 0.204964 | 25.61277 |
| GOTERM_BFGO:000931oligosacc | 4 | 1.286174 | 0.022298 | 266 | 31 | 13528 | 6.562212 | 1        | 0.246145 | 32.29667 |
| GOTERM_BFGO:000282positive  | 4 | 1.286174 | 0.022298 | 266 | 31 | 13528 | 6.562212 | 1        | 0.246145 | 32.29667 |
| GOTERM_BFGO:004224tissue re | 4 | 1.286174 | 0.024257 | 266 | 32 | 13528 | 6.357143 | 1        | 0.259574 | 34.605   |
| GOTERM_BFGO:000193regulatic | 4 | 1.286174 | 0.024257 | 266 | 32 | 13528 | 6.357143 | 1        | 0.259574 | 34.605   |
| GOTERM_BFGO:000677fat-solut | 4 | 1.286174 | 0.026306 | 266 | 33 | 13528 | 6.164502 | 1        | 0.271698 | 36.93996 |
| GOTERM_BFGO:000270positive  | 4 | 1.286174 | 0.028445 | 266 | 34 | 13528 | 5.983193 | 1        | 0.286429 | 39.29338 |
| GOTERM_BFGO:000270positive  | 4 | 1.286174 | 0.028445 | 266 | 34 | 13528 | 5.983193 | 1        | 0.286429 | 39.29338 |
| GOTERM_BFGO:005088neuromusc | 4 | 1.286174 | 0.030674 | 266 | 35 | 13528 | 5.812245 | 1        | 0.299812 | 41.65717 |
| GOTERM_BFGO:001921regulatic | 4 | 1.286174 | 0.032991 | 266 | 36 | 13528 | 5.650794 | 1        | 0.310419 | 44.02337 |
| GOTERM_BFGO:003134negative  | 4 | 1.286174 | 0.032991 | 266 | 36 | 13528 | 5.650794 | 1        | 0.310419 | 44.02337 |
| GOTERM_BFGO:000695acute-phs | 4 | 1.286174 | 0.043142 | 266 | 40 | 13528 | 5.085714 | 1        | 0.364176 | 53.36193 |
| GOTERM_BFGO:003164regulatic | 4 | 1.286174 | 0.048736 | 266 | 42 | 13528 | 4.843537 | 1        | 0.385478 | 57.85947 |
| GOTERM_BFGO:004259response  | 4 | 1.286174 | 0.048736 | 266 | 42 | 13528 | 4.843537 | 1        | 0.385478 | 57.85947 |
| GOTERM_BFGO:000664triglycer | 4 | 1.286174 | 0.051659 | 266 | 43 | 13528 | 4.730897 | 1        | 0.400802 | 60.04416 |
| GOTERM_BFGO:000269positive  | 4 | 1.286174 | 0.054665 | 266 | 44 | 13528 | 4.623377 | 1        | 0.414597 | 62.17932 |
| GOTERM_BFGO:000663acylglyce | 4 | 1.286174 | 0.070904 | 266 | 49 | 13528 | 4.151603 | 1        | 0.473949 | 71.97283 |
| GOTERM_BFGO:000663neutral l | 4 | 1.286174 | 0.074384 | 266 | 50 | 13528 | 4.068571 | 1        | 0.486671 | 73.73436 |
| GOTERM_BFGO:004558regulatic | 4 | 1.286174 | 0.077939 | 266 | 51 | 13528 | 3.988796 | 1        | 0.500598 | 75.42558 |
| GOTERM_BFGO:004863regulatic | 4 | 1.286174 | 0.077939 | 266 | 51 | 13528 | 3.988796 | 1        | 0.500598 | 75.42558 |
| GOTERM_BFGO:000666glycerol  | 4 | 1.286174 | 0.077939 | 266 | 51 | 13528 | 3.988796 | 1        | 0.500598 | 75.42558 |

|                    |           |   |          |          |     |    |       |          |          |          |          |
|--------------------|-----------|---|----------|----------|-----|----|-------|----------|----------|----------|----------|
| GOTERM_BFGO:000906 | glutamine | 4 | 1.286174 | 0.081567 | 266 | 52 | 13528 | 3.912088 | 1        | 0.512911 | 77.04546 |
| GOTERM_BFGO:001890 | organic c | 4 | 1.286174 | 0.085267 | 266 | 53 | 13528 | 3.838275 | 1        | 0.525011 | 78.59342 |
| GOTERM_BFGO:001000 | glial cel | 4 | 1.286174 | 0.085267 | 266 | 53 | 13528 | 3.838275 | 1        | 0.525011 | 78.59342 |
| GOTERM_BFGO:004247 | odontoger | 4 | 1.286174 | 0.089038 | 266 | 54 | 13528 | 3.767196 | 1        | 0.535499 | 80.06927 |
| GOTERM_BFGO:005159 | response  | 4 | 1.286174 | 0.092877 | 266 | 55 | 13528 | 3.698701 | 1        | 0.545786 | 81.47322 |
| GOTERM_BFGO:000282 | regulatic | 4 | 1.286174 | 0.092877 | 266 | 55 | 13528 | 3.698701 | 1        | 0.545786 | 81.47322 |
| GOTERM_BFGO:000803 | cell recc | 4 | 1.286174 | 0.092877 | 266 | 55 | 13528 | 3.698701 | 1        | 0.545786 | 81.47322 |
| GOTERM_BFGO:003294 | positive  | 4 | 1.286174 | 0.096783 | 266 | 56 | 13528 | 3.632653 | 1        | 0.55724  | 82.8058  |
| GOTERM_BFGO:007066 | positive  | 4 | 1.286174 | 0.096783 | 266 | 56 | 13528 | 3.632653 | 1        | 0.55724  | 82.8058  |
| GOTERM_BFGO:000668 | gangliosi | 3 | 0.96463  | 0.002235 | 266 | 4  | 13528 | 38.14286 | 0.990991 | 0.041178 | 3.795735 |
| GOTERM_BFGO:000931 | oligosacc | 3 | 0.96463  | 0.002235 | 266 | 4  | 13528 | 38.14286 | 0.990991 | 0.041178 | 3.795735 |
| GOTERM_BFGO:001095 | negative  | 3 | 0.96463  | 0.002235 | 266 | 4  | 13528 | 38.14286 | 0.990991 | 0.041178 | 3.795735 |
| GOTERM_BFGO:007061 | regulatic | 3 | 0.96463  | 0.005444 | 266 | 6  | 13528 | 25.42857 | 0.99999  | 0.084593 | 9.009141 |
| GOTERM_BFGO:001095 | regulatic | 3 | 0.96463  | 0.005444 | 266 | 6  | 13528 | 25.42857 | 0.99999  | 0.084593 | 9.009141 |
| GOTERM_BFGO:000157 | gangliosi | 3 | 0.96463  | 0.009902 | 266 | 8  | 13528 | 19.07143 | 1        | 0.138966 | 15.81158 |
| GOTERM_BFGO:000292 | regulatic | 3 | 0.96463  | 0.022167 | 266 | 12 | 13528 | 12.71429 | 1        | 0.246143 | 32.13909 |
| GOTERM_BFGO:000652 | arginine  | 3 | 0.96463  | 0.025863 | 266 | 13 | 13528 | 11.73626 | 1        | 0.269042 | 36.4417  |
| GOTERM_BFGO:001059 | negative  | 3 | 0.96463  | 0.029789 | 266 | 14 | 13528 | 10.89796 | 1        | 0.296517 | 40.72992 |
| GOTERM_BFGO:004671 | muscle m  | 3 | 0.96463  | 0.029789 | 266 | 14 | 13528 | 10.89796 | 1        | 0.296517 | 40.72992 |
| GOTERM_BFGO:000695 | complemer | 3 | 0.96463  | 0.033935 | 266 | 15 | 13528 | 10.17143 | 1        | 0.31512  | 44.9614  |
| GOTERM_BFGO:000195 | regulatic | 3 | 0.96463  | 0.038291 | 266 | 16 | 13528 | 9.535714 | 1        | 0.339715 | 49.09936 |
| GOTERM_BFGO:001004 | response  | 3 | 0.96463  | 0.042847 | 266 | 17 | 13528 | 8.97479  | 1        | 0.363565 | 53.11261 |
| GOTERM_BFGO:000193 | negative  | 3 | 0.96463  | 0.047593 | 266 | 18 | 13528 | 8.47619  | 1        | 0.382395 | 56.97545 |
| GOTERM_BFGO:003436 | plasma li | 3 | 0.96463  | 0.057621 | 266 | 20 | 13528 | 7.628571 | 1        | 0.42185  | 64.17299 |
| GOTERM_BFGO:003436 | macromole | 3 | 0.96463  | 0.057621 | 266 | 20 | 13528 | 7.628571 | 1        | 0.42185  | 64.17299 |
| GOTERM_BFGO:005118 | cofactor  | 3 | 0.96463  | 0.057621 | 266 | 20 | 13528 | 7.628571 | 1        | 0.42185  | 64.17299 |
| GOTERM_BFGO:003436 | protein-l | 3 | 0.96463  | 0.057621 | 266 | 20 | 13528 | 7.628571 | 1        | 0.42185  | 64.17299 |
| GOTERM_BFGO:004647 | phosphati | 3 | 0.96463  | 0.062885 | 266 | 21 | 13528 | 7.265306 | 1        | 0.438344 | 67.48115 |
| GOTERM_BFGO:005101 | actin fil | 3 | 0.96463  | 0.062885 | 266 | 21 | 13528 | 7.265306 | 1        | 0.438344 | 67.48115 |
| GOTERM_BFGO:001633 | calcium-c | 3 | 0.96463  | 0.073871 | 266 | 23 | 13528 | 6.63354  | 1        | 0.485614 | 73.48136 |
| GOTERM_BFGO:000190 | cell kill | 3 | 0.96463  | 0.079578 | 266 | 24 | 13528 | 6.357143 | 1        | 0.506726 | 76.17008 |
| GOTERM_BFGO:001074 | regulatic | 3 | 0.96463  | 0.085417 | 266 | 25 | 13528 | 6.102857 | 1        | 0.524258 | 78.65383 |
| GOTERM_BFGO:002178 | glial cel | 3 | 0.96463  | 0.09138  | 266 | 26 | 13528 | 5.868132 | 1        | 0.541062 | 80.93752 |
| GOTERM_BFGO:003110 | organ reg | 3 | 0.96463  | 0.09138  | 266 | 26 | 13528 | 5.868132 | 1        | 0.541062 | 80.93752 |
| GOTERM_BFGO:000195 | regulatic | 3 | 0.96463  | 0.097462 | 266 | 27 | 13528 | 5.650794 | 1        | 0.555804 | 83.02791 |
| GOTERM_BFGO:004542 | regulatic | 3 | 0.96463  | 0.097462 | 266 | 27 | 13528 | 5.650794 | 1        | 0.555804 | 83.02791 |

|                             |   |          |          |     |   |       |          |   |          |          |
|-----------------------------|---|----------|----------|-----|---|-------|----------|---|----------|----------|
| GOTERM_BFGO:004248positive  | 2 | 0.643087 | 0.038796 | 266 | 2 | 13528 | 50.85714 | 1 | 0.341999 | 49.55922 |
| GOTERM_BFGO:003461cellular  | 2 | 0.643087 | 0.038796 | 266 | 2 | 13528 | 50.85714 | 1 | 0.341999 | 49.55922 |
| GOTERM_BFGO:000186regulatic | 2 | 0.643087 | 0.038796 | 266 | 2 | 13528 | 50.85714 | 1 | 0.341999 | 49.55922 |
| GOTERM_BFGO:004248positive  | 2 | 0.643087 | 0.038796 | 266 | 2 | 13528 | 50.85714 | 1 | 0.341999 | 49.55922 |
| GOTERM_BFGO:000186negative  | 2 | 0.643087 | 0.038796 | 266 | 2 | 13528 | 50.85714 | 1 | 0.341999 | 49.55922 |
| GOTERM_BFGO:000611NADH oxid | 2 | 0.643087 | 0.038796 | 266 | 2 | 13528 | 50.85714 | 1 | 0.341999 | 49.55922 |
| GOTERM_BFGO:004003negative  | 2 | 0.643087 | 0.057628 | 266 | 3 | 13528 | 33.90476 | 1 | 0.420504 | 64.17749 |
| GOTERM_BFGO:004251regulatic | 2 | 0.643087 | 0.057628 | 266 | 3 | 13528 | 33.90476 | 1 | 0.420504 | 64.17749 |
| GOTERM_BFGO:004591negative  | 2 | 0.643087 | 0.057628 | 266 | 3 | 13528 | 33.90476 | 1 | 0.420504 | 64.17749 |
| GOTERM_BFGO:004251positive  | 2 | 0.643087 | 0.057628 | 266 | 3 | 13528 | 33.90476 | 1 | 0.420504 | 64.17749 |
| GOTERM_BFGO:003044regulatic | 2 | 0.643087 | 0.057628 | 266 | 3 | 13528 | 33.90476 | 1 | 0.420504 | 64.17749 |
| GOTERM_BFGO:001940alditol c | 2 | 0.643087 | 0.057628 | 266 | 3 | 13528 | 33.90476 | 1 | 0.420504 | 64.17749 |
| GOTERM_BFGO:004227susceptit | 2 | 0.643087 | 0.057628 | 266 | 3 | 13528 | 33.90476 | 1 | 0.420504 | 64.17749 |
| GOTERM_BFGO:004617polyol ce | 2 | 0.643087 | 0.076092 | 266 | 4 | 13528 | 25.42857 | 1 | 0.493373 | 74.55988 |
| GOTERM_BFGO:000700outer mit | 2 | 0.643087 | 0.076092 | 266 | 4 | 13528 | 25.42857 | 1 | 0.493373 | 74.55988 |
| GOTERM_BFGO:007009mitochonc | 2 | 0.643087 | 0.076092 | 266 | 4 | 13528 | 25.42857 | 1 | 0.493373 | 74.55988 |
| GOTERM_BFGO:004582negative  | 2 | 0.643087 | 0.076092 | 266 | 4 | 13528 | 25.42857 | 1 | 0.493373 | 74.55988 |
| GOTERM_BFGO:001061positive  | 2 | 0.643087 | 0.076092 | 266 | 4 | 13528 | 25.42857 | 1 | 0.493373 | 74.55988 |
| GOTERM_BFGO:000292negative  | 2 | 0.643087 | 0.076092 | 266 | 4 | 13528 | 25.42857 | 1 | 0.493373 | 74.55988 |
| GOTERM_BFGO:001474positive  | 2 | 0.643087 | 0.076092 | 266 | 4 | 13528 | 25.42857 | 1 | 0.493373 | 74.55988 |
| GOTERM_BFGO:006033regulatic | 2 | 0.643087 | 0.076092 | 266 | 4 | 13528 | 25.42857 | 1 | 0.493373 | 74.55988 |
| GOTERM_BFGO:003296collagen  | 2 | 0.643087 | 0.094196 | 266 | 5 | 13528 | 20.34286 | 1 | 0.549726 | 81.93362 |
| GOTERM_BFGO:005100negative  | 2 | 0.643087 | 0.094196 | 266 | 5 | 13528 | 20.34286 | 1 | 0.549726 | 81.93362 |
| GOTERM_BFGO:000688cellular  | 2 | 0.643087 | 0.094196 | 266 | 5 | 13528 | 20.34286 | 1 | 0.549726 | 81.93362 |
| GOTERM_BFGO:007012ciliary r | 2 | 0.643087 | 0.094196 | 266 | 5 | 13528 | 20.34286 | 1 | 0.549726 | 81.93362 |
| GOTERM_BFGO:002261membrane  | 2 | 0.643087 | 0.094196 | 266 | 5 | 13528 | 20.34286 | 1 | 0.549726 | 81.93362 |
| GOTERM_BFGO:004651ceramide  | 2 | 0.643087 | 0.094196 | 266 | 5 | 13528 | 20.34286 | 1 | 0.549726 | 81.93362 |
| GOTERM_BFGO:004248regulatic | 2 | 0.643087 | 0.094196 | 266 | 5 | 13528 | 20.34286 | 1 | 0.549726 | 81.93362 |
| GOTERM_BFGO:003038fructose  | 2 | 0.643087 | 0.094196 | 266 | 5 | 13528 | 20.34286 | 1 | 0.549726 | 81.93362 |

## Supporting Information Tables 8

### Sub-cellular distributions of 318 proteins in human urine

| Category           | Term      | Count | %        | PValue   | List | TotalPop | Hits | Pop   | TotalFold | EnriBonferror | Benjamini | FDR      |
|--------------------|-----------|-------|----------|----------|------|----------|------|-------|-----------|---------------|-----------|----------|
| GOTERM_CCGO:001602 | membrane  | 150   | 48.23151 | 0.020138 |      | 278      | 7266 | 15294 | 1.135722  | 0.565737      | 0.073024  | 17.07386 |
| GOTERM_CCGO:004442 | extracell | 98    | 31.51125 | 2.17E-47 |      | 278      | 960  | 15294 | 5.616052  | 8.91E-46      | 8.91E-46  | 2.00E-44 |
| GOTERM_CCGO:000561 | extracell | 75    | 24.11576 | 2.54E-37 |      | 278      | 685  | 15294 | 6.023473  | 1.04E-35      | 5.20E-36  | 2.34E-34 |
| GOTERM_CCGO:003198 | vesicle   | 45    | 14.46945 | 8.72E-14 |      | 278      | 670  | 15294 | 3.694996  | 3.58E-12      | 7.16E-13  | 8.03E-11 |
| GOTERM_CCGO:000026 | cell frac | 43    | 13.82637 | 2.20E-06 |      | 278      | 1083 | 15294 | 2.18432   | 9.03E-05      | 1.13E-05  | 0.002026 |
| GOTERM_CCGO:003101 | extracell | 36    | 11.57556 | 8.53E-17 |      | 278      | 345  | 15294 | 5.740632  | 4.55E-15      | 1.55E-15  | 9.99E-14 |
| GOTERM_CCGO:000998 | cell surf | 33    | 10.61093 | 3.66E-14 |      | 278      | 348  | 15294 | 5.216882  | 1.50E-12      | 3.75E-13  | 3.37E-11 |
| GOTERM_CCGO:004299 | cell pro  | 26    | 8.360129 | 9.14E-04 |      | 278      | 697  | 15294 | 2.052187  | 0.036809      | 0.004158  | 0.838248 |
| GOTERM_CCGO:004517 | apical pe | 19    | 6.109325 | 4.27E-09 |      | 278      | 179  | 15294 | 5.839516  | 1.75E-07      | 2.50E-08  | 3.93E-06 |
| GOTERM_CCGO:004442 | extracell | 17    | 5.466238 | 3.40E-10 |      | 278      | 117  | 15294 | 7.993544  | 1.40E-08      | 2.33E-09  | 3.13E-07 |
| GOTERM_CCGO:003435 | plasma li | 5     | 1.607717 | 0.003544 |      | 278      | 35   | 15294 | 7.859198  | 0.135475      | 0.014452  | 3.214707 |
| GOTERM_CCGO:003299 | protein-l | 5     | 1.607717 | 0.003544 |      | 278      | 35   | 15294 | 7.859198  | 0.135475      | 0.014452  | 3.214707 |



**Supporting Information Tables 9.** Information of patients and controls involved in urine CP analysis.

| <b>Characteristic</b>        | <b>Cancer (n=60)</b> |          | <b>Control(n=60)</b> |          |
|------------------------------|----------------------|----------|----------------------|----------|
|                              | <b>NO.</b>           | <b>%</b> | <b>NO.</b>           | <b>%</b> |
| <b>Age Year</b>              |                      |          |                      |          |
| Median                       |                      | 54.2     |                      | 45.1     |
| Range                        |                      | 46-73    |                      | 25-78    |
| <b>Sex</b>                   |                      |          |                      |          |
| Female                       | 22                   | 36.6%    | 25                   | 41.6%    |
| Male                         | 38                   | 63.4%    | 35                   | 58.4%    |
| <b>Smoking</b>               | 26                   | 43.3%    | 28                   | 46.7%    |
| <b>TNM stage</b>             |                      |          |                      |          |
| T1N0M0                       | 15                   | 25.0%    | --                   | --       |
| T2N0M0                       | 21                   | 35.0%    | --                   | --       |
| T2N0M1                       | 1                    | 1.6%     | --                   | --       |
| T2N1M0                       | 11                   | 18.3%    | --                   | --       |
| T2N2M0                       | 8                    | 13.3%    | --                   | --       |
| T3N0M0                       | 1                    | 1.6%     | --                   | --       |
| T3N1M0                       | 1                    | 1.6%     | --                   | --       |
| T4N0M0                       | 1                    | 1.6%     | --                   | --       |
| T4N2M0                       | 1                    | 1.6%     | --                   | --       |
| <b>Histology</b>             |                      |          |                      |          |
| Squamous cell Carcinoma      | 25                   | 41.6%    | --                   | --       |
| Adneocarcinoma               | 29                   | 48.3%    | --                   | --       |
| Adneosquamous carcinoma      | 2                    | 3.3%     | --                   | --       |
| Large cell carcinoma         | 1                    | 1.6%     | --                   | --       |
| Small cell lung cancer       | 2                    | 3.3%     | --                   | --       |
| Bronchioloalveolar carcinoma | 1                    | 1.6%     | --                   | --       |

**Supporting Information Tables 10.** Information of patients and controls involved in urine Orm1 analysis.

| <b>Characteristic</b>   | <b>Cancer (n=16)</b> |          | <b>Control(n=8)</b> |          |
|-------------------------|----------------------|----------|---------------------|----------|
|                         | <b>NO.</b>           | <b>%</b> | <b>NO.</b>          | <b>%</b> |
| <b>Age Year</b>         |                      |          |                     |          |
| Median                  |                      | 48.9     |                     | 56.6     |
| Range                   |                      | 22-64    |                     | 44-75    |
| <b>Sex</b>              |                      |          |                     |          |
| Female                  | 4                    | 25.0%    | 3                   | 37.5%    |
| Male                    | 12                   | 75.0%    | 5                   | 62.5%    |
| <b>Smoking</b>          | 7                    | 43.7%    | 4                   | 50%      |
| <b>Histology</b>        |                      |          |                     |          |
| Squamous cell Carcinoma | 2                    | 12.5%    | --                  | --       |
| Adenocarcinoma          | 13                   | 81.3%    | --                  | --       |
| Small cell lung cancer  | 1                    | 6.3%     | --                  | --       |
